# Supplementary material for: Organocatalytic kinetic resolution of 1,5-dicarbonyl compounds through a retro-Michael reaction
Source: publisher site journal article supplement (doi:10.3762/bjoc.21.34), 2025-03-03

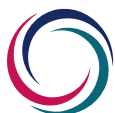

## Supporting Information

for

### Organocatalytic kinetic resolution of 1,5-dicarbonyl compounds through a retro-Michael reaction

James Guevara-Pulido, Fernando González-Pérez, José M. Andrés and Rafael Pedrosa

*Beilstein J. Org. Chem.* **2025**, *21*, 473–482. doi:10.3762/bjoc.21.34

### Characterization data, copies of spectra and HPLC chromatograms

## Table of contents

|                                            |     |
|--------------------------------------------|-----|
| 1. Characterization data of compounds..... | S2  |
| 2. References.....                         | S7  |
| 2. NMR Spectra for new compounds.....      | S8  |
| 3. HPLC Chromatograms .....                | S22 |

## 1. Characterization data of compounds

**(S)-3-(4-Methoxyphenyl)-5-oxo-4,5-diphenylpentanal (1).** White solid, mp 116-119 °C (hexane), (75 mg, 0.209 mmol, 50%), (84% ee). *Syn:anti* 1:2. <sup>1</sup>H-NMR (500

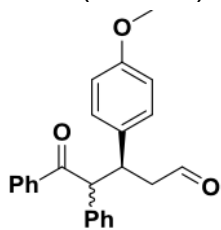

MHz, CDCl<sub>3</sub>) δ 9.59 (dd, J = 2.8, 1.5 Hz, 0.3H, CHO<sub>syn</sub>), 9.40 (dd, J = 2.5, 1.6 Hz, 0.7H, CHO<sub>anti</sub>), 8.01 – 7.92 (m, 0.7H), 7.83 – 7.77 (m, 1.4H), 7.53 – 7.26 (m, 7H), 7.09 (td, J = 7.0, 2.9 Hz, 1.8H), 6.93 (d, J = 8.7 Hz, 1H), 6.80 – 6.76 (m, 1.4H), 6.67 (d, J = 8.7 Hz, 0.7H), 4.95 (d, J = 10.6 Hz, 0.7H, CHPh<sub>anti</sub>), 4.80 (d, J = 10.5 Hz, 0.3H CHPh<sub>syn</sub>), 4.22 (td, J = 10.2, 4.8 Hz, 0.7H, CHC<sub>6</sub>H<sub>4</sub>OMe<sub>anti</sub>), 4.09 (td, J = 10.0, 4.6 Hz, 0.3H, CHC<sub>6</sub>H<sub>4</sub>OMe<sub>syn</sub>), 3.73 (s, 2H, CH<sub>3</sub>O<sub>anti</sub>), 3.71 (s, 1H, CH<sub>3</sub>O<sub>syn</sub>), 2.93 – 2.78 (m, 0.6H), 2.62 – 2.48 (m, 1.4H). <sup>13</sup>C-NMR (126 MHz, CDCl<sub>3</sub>) δ 201.3, 201.4, 199.4, 198.5, 158.4, 158.3, 137.0, 136.8, 136.7, 134.1, 133.3, 132.9, 132.6, 129.4, 129.3, 129.1, 129.0, 128.9, 128.8, 128.7, 128.6, 128.5, 128.4, 128.0, 127.2, 114.1, 113.8, 59.74, 59.32, 55.22, 55.18, 48.25, 47.92, 43.31, 42.58. IR 2938, 1710, 1673, 1512, 1245, 695 cm<sup>-1</sup>. HPLC (Chiralpak AD-H (hexane/iPrOH = 90:10) 1.0 mLmin<sup>-1</sup> λ = 254 nm) t<sub>R</sub> = 31.8 (minor), t<sub>R</sub> = 33.2 (major). HRMS C<sub>24</sub>H<sub>23</sub>O<sub>3</sub> (M+H) Calc: 359.1642; Found: 359.1645.

**(S)-3-(2-Nitrophenyl)-5-oxo-4,5-diphenylpentanal (2).** Yellow oil, (93 mg, 0.250 mmol, 60%), (58% ee). *Syn:anti* 1:2. <sup>1</sup>H-NMR (500 MHz, CDCl<sub>3</sub>) δ 9.67 (s, 0.3H, CHO<sub>syn</sub>), 9.45 (s, 0.7H, CHO<sub>anti</sub>), 7.85 (dd, J = 68.9, 7.9 Hz, 3H),

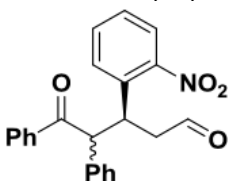

7.30 (m, 11H), 5.16 (d, J = 10.1 Hz, 0.7H, CHPh<sub>anti</sub>), 5.07 (d, J = 9.7 Hz, 0.3H, CHPh<sub>syn</sub>), 4.85 (m, 0.3H CHC<sub>6</sub>H<sub>4</sub>NO<sub>2syn</sub>), 4.75 (m, 0.7H CHC<sub>6</sub>H<sub>4</sub>NO<sub>2anti</sub>), 3.03 (dd, J = 8.5, 2.7 Hz, 0.7H), 2.78 (dd, J = 16.9, 4.3 Hz, 0.7H), 2.60 (dd, J = 16.4, 8.1 Hz, 0.6H). <sup>13</sup>C-NMR (126 MHz, CDCl<sub>3</sub>) δ 200.5, 197.4, 150.6, 150.5, 136.9, 136.5, 136.1, 135.9, 135.7, 135.4, 133.3, 133.1, 132.7, 132.4, 129.5, 129.0, 128.9, 128.7, 128.6, 128.5, 128.4, 128.3, 127.6, 127.5, 124.7, 124.4, 124.3, 58.4, 58.00, 47.46, 47.08, 29.66, 30.91. IR 3066, 3023, 1720, 1672, 1518, 1352, 701 cm<sup>-1</sup>. HPLC (Chiralpak AD-H (hexane/iPrOH = 90:10) 0.5 mLmin<sup>-1</sup> λ = 254 nm) t<sub>R</sub> = 74.1 (minor), t<sub>R</sub> = 77.4 (major). HRMS C<sub>23</sub>H<sub>20</sub>NO<sub>4</sub> (M+H) Calc: 374.1387; Found: 374.1390.

**(S)-5-Oxo-3,4,5-triphenylpentanal (3).** <sup>1</sup> White solid, mp 181-184 °C (hexane), (76 mg, 0.23 mmol, 55%), (72% ee). *Syn:anti* 1:3. <sup>1</sup>H-NMR (500

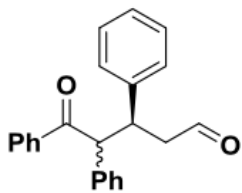

MHz, CDCl<sub>3</sub>) δ (syn 9.59 (dd, J = 12.7, 10.6 Hz, 0.3), 9.39 (s, 0.7H), 8.13 – 7.91 (m, 1H), 7.78 (dd, J = 8.3, 1.0 Hz, 1.5H), 7.43 (dd, J = 12.5, 5.1 Hz, 2H), 7.42 – 7.38 (m, 1H), 7.38 – 7.30 (m, 3.5H), 7.30 – 7.27 (m, 1H), 7.29 – 7.17 (m, 3H), 7.12 (t, J = 7.4 Hz, 1H), 7.10 – 7.03 (m, 0.7H), 7.03 – 7.00 (m, 0.3H), 4.99 (d, J = 10.6 Hz, 0.7H, CHPh<sub>anti</sub>), 4.83 (d, J = 10.5 Hz, 0.3H, CHPh<sub>syn</sub>), 4.26 (td, J = 10.1, 4.9 Hz, 0.7H, CH<sub>2</sub>CHPh<sub>anti</sub>), 4.12 (d, J = 6.9 Hz, 0.3H, CH<sub>2</sub>CHPh<sub>syn</sub>), 2.63 (dd, J =

9.6, 2.5 Hz, 0.3H), 2.59 (dd, J = 9.6, 2.5 Hz, 0.7H), 2.54 (dd, J = 4.9, 1.5 Hz, 0.3H), 2.51 (dd, J = 4.9, 1.5 Hz, 0.7H). <sup>13</sup>C-NMR (126 MHz, CDCl<sub>3</sub>) δ 201.2, 201.0, 198.4, 142.1, 137.0, 136.6, 133.3, 132.9, 129.4, 129.1, 128.9, 128.5, 128.4, 128.1, 127.2, 127.0, 126.8, 59.61, 59.07, 48.17, 47.86, 44.09, 43.38. IR 3060, 3034, 1713, 1671, 1499, 1447, 695 cm<sup>-1</sup>. HPLC (Chiralpak AD-H (hexane/iPrOH = 95:5) 1.0 mLmin<sup>-1</sup> λ = 254 nm) t<sub>R</sub> = 31.6 (minor), t<sub>R</sub> = 33.1 (major). HRMS C<sub>23</sub>H<sub>21</sub>O<sub>2</sub> (M+H) Calc: 329.1536; Found: 329.1540.

**(3S,4R)-5-Oxo-3,4-diphenylheptanal (4).**<sup>2</sup> White solid, mp 95-98 °C (hexane), (61 mg, 0.217 mmol, 52%). [α]<sub>D</sub><sup>25</sup> = + 9.2 (c = 1, CHCl<sub>3</sub>, 62% ee).

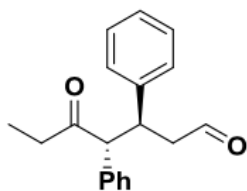

<sup>1</sup>H-NMR (500 MHz, CDCl<sub>3</sub>) δ 9.37 (dd, J = 2.5, 1.6 Hz, 1H), 7.37 (s, 1H), 7.36 (s, 2H), 7.33 (d, J = 4.4 Hz, 1H), 7.32 – 7.29 (m, 4H), 7.27 (d, J = 0.5 Hz, 1H), 7.21 (dt, J = 5.5, 4.0 Hz, 1H), 4.08 – 4.03 (m, 2H), 2.60 – 2.52 (m, 1H), 2.44 – 2.37 (m, 1H), 2.35 – 2.28 (m, 1H), 2.02 – 1.95 (m, 1H), 0.72 (t, J = 7.3 Hz, 3H); <sup>13</sup>C-NMR (126 MHz, CDCl<sub>3</sub>) δ 209.3, 200.8, 141.8, 136.2, 129.2, 128.9, 128.8, 128.7, 128.5, 128.3, 128.2, 128.1, 128.0, 127.0, 64.13, 47.57, 42.62, 36.70, 7.38. IR 3034, 2938, 1710, 1496, 1454, 696 cm<sup>-1</sup>. HPLC (Chiralcel OJ-H (hexane/iPrOH = 95:5) 1.0 mLmin<sup>-1</sup> λ = 220 nm) t<sub>R</sub> = 24.3 (major); t<sub>R</sub> = 27.4 (minor). HRMS C<sub>19</sub>H<sub>21</sub>O<sub>2</sub> (M+H), Calc: 281.1536, Found: 281.1536.

**(3S,4R)-3-(4-Methoxyphenyl)-5-oxo-4-phenylheptanal (5).** White solid, mp 100-109 °C (hexane), (65 mg, 0.209 mmol, 50%). [α]<sub>D</sub><sup>20</sup> = + 6.2 (c = 1, CHCl<sub>3</sub>, 76% ee).

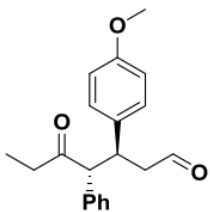

<sup>1</sup>H-NMR (500 MHz, CDCl<sub>3</sub>) δ 9.34 (s, 1H), 7.41 (d, J = 15.8 Hz, 2H), 7.35 (s, 1H), 7.21 (d, J = 8.3 Hz, 2H), 6.82 (d, J = 8.3 Hz, 2H), 6.59 (dd, J = 15.8, 7.7 Hz, 2H), 4.00 (d, J = 2.9 Hz, 2H), 3.75 (s, 3H), 2.50 (dd, J = 10.8, 7.8 Hz, 1H), 2.38 – 2.26 (m, 2H), 2.03 – 1.94 (m, 1H), 0.71 (t, J = 7.1 Hz, 3H); <sup>13</sup>C-NMR (126 MHz, CDCl<sub>3</sub>) δ 209.5, 201.1, 162.2, 158.4, 152.7, 136.4, 133.7, 129.1, 129.0, 128.8, 128.0, 126.8, 126.6, 114.1, 64.37, 55.19, 47.63, 41.87, 36.77, 7.41. IR 2943, 2842, 1710, 1662, 1598, 1507, 1254, 824 cm<sup>-1</sup>. HPLC (Chiralpak AD-H (hexane/iPrOH = 90:10) 1.0 mLmin<sup>-1</sup> λ = 254 nm) t<sub>R</sub> = 12.1 (major); t<sub>R</sub> = 14.2 (minor). HRMS C<sub>20</sub>H<sub>23</sub>O<sub>3</sub> (M+H) Calc: 311.1642; Found: 311.1638.

**(3S,4R)-5-Oxo-3,4,6-triphenylhexanal (6).**<sup>2</sup> White solid, mp 119-121 °C (hexane), (93 mg, 0.272 mmol, 65%). [α]<sub>D</sub><sup>20</sup> = - 68.1 (c = 1, CHCl<sub>3</sub>, 62% ee).

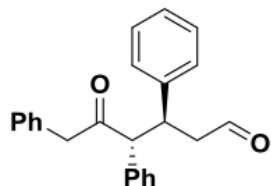

<sup>1</sup>H-NMR (500 MHz, CDCl<sub>3</sub>) δ 9.33 (s, 1H), 7.55 – 7.17 (m, 13H), 6.71 (d, J = 6.3 Hz, 2H), 4.13 (d, J = 11.1 Hz, 1H), 4.05 (dd, J = 10.1, 4.1 Hz, 1H), 3.38 (q, J = 15.7 Hz, 2H), 2.50 (dd, J = 14.8, 10.2 Hz, 1H), 2.35 (dd, J = 16.9, 3.0 Hz, 1H); <sup>13</sup>C-NMR (126 MHz, CDCl<sub>3</sub>) δ 205.7, 200.7, 2C (141.5), 2C(135.8), 2C(133.2), 2C(129.5), 129.2, 129.0, 128.7, 128.6, 128.5, 128.1, 128.1,

127.1, 126.9, 126.8, 62.75, 50.23, 47.51, 42.60. IR 3055, 3028, 1704, 1491, 1454, 701  $\text{cm}^{-1}$ . HPLC (Chiralpak AD-H (hexane/iPrOH = 97:3) 0.7  $\text{mLmin}^{-1}$   $\lambda$  = 220 nm)  $t_R$  = 35.4 (minor);  $t_R$  = 37.8 (major). HRMS  $\text{C}_{24}\text{H}_{23}\text{O}_2$  (M+H), Calc: 343.1693, Found: 343.1692.

**(3S,4R)-3-(4-Methoxyphenyl)-5-oxo-4,6-diphenylhexanal (7).**<sup>2</sup> White solid, mp 83-85  $^{\circ}\text{C}$  (hexane), (81 mg, 0.217 mmol, 52%).  $[\alpha]_{\text{D}}^{20}$  = - 66.4 (c = 1,  $\text{CH}_2\text{Cl}_2$ , 70% ee).  $^1\text{H-NMR}$  (500 MHz,  $\text{CDCl}_3$ )  $\delta$  9.32 (dd, J = 2.4, 1.3 Hz, 1H), 7.37 – 7.34 (m, 2H), 7.31 – 7.29 (m, 2H), 7.19 – 7.15 (m, 4H), 7.09 (d, J = 8.7 Hz, 2H), 6.78 (d, J = 8.6 Hz, 2H), 6.75 – 6.72 (m, 2H), 4.09 (d, J = 11.1 Hz, 1H), 4.01 (dd, J = 10.5, 4.5 Hz, 1H), 3.79 (s, 3H), 3.38 (d, J = 6.6 Hz, 2H), 2.46 (ddd, J = 16.7, 10.2, 2.7 Hz, 1H), 2.32 (ddd, J = 16.7, 4.4, 1.2 Hz, 1H);  $^{13}\text{C-NMR}$  (126 MHz,  $\text{CDCl}_3$ )  $\delta$  205.9, 201.0, 158.4, 2C(135.9), 2C(133.4), 2C(133.2), 129.5, 129.4, 129.2, 129.1, 129.0, 128.7, 128.5, 128.1, 127.1, 126.8, 114.0, 63.03, 55.22, 50.30, 47.55, 41.84. IR 3023, 2906, 1715, 1512, 1496, 1251, 696  $\text{cm}^{-1}$ . HPLC (Chiralpak AD-H (hexane/iPrOH = 90:10) 1.0  $\text{mLmin}^{-1}$   $\lambda$  = 220 nm)  $t_R$  = 16.4 (major);  $t_R$  = 21.2 (minor). HRMS  $\text{C}_{25}\text{H}_{25}\text{O}_3$  (M+H), Calc: 373.1798, Found: 373.1798.

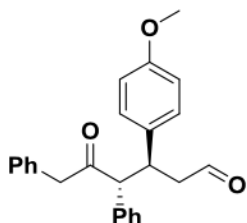

**(3S)-3-Methyl-5-oxo-5-phenyl-4-(phenylsulfonyl)pentanal (8).**<sup>3</sup> Yellow oil, (63 mg, 0.19 mmol, 45%),  $[\alpha]_{\text{D}}^{20}$  = - 8.25 (c = 1,  $\text{CH}_2\text{Cl}_2$ , 66% ee). *Syn:anti* 1:1.  $^1\text{H-NMR}$  (500 MHz,  $\text{CDCl}_3$ )  $\delta$  9.82 (s, 0.5H,  $\text{CHO}_{\text{anti}}$ ), 9.67 (d, J = 0.7 Hz, 0.5H,  $\text{CHO}_{\text{syn}}$ ), 7.58 (m, 10H), 5.50 (d, J = 9.4 Hz, 0.5H), 5.30 (d, J = 0.8 Hz, 0.5H), 3.06 (m, 2.5H), 2.49 (m, 0.5H), 1.29 (d, J = 7.0 Hz, 1.5H), 1.05 (d, J = 6.9 Hz, 1.5H).  $^{13}\text{C-NMR}$  (126 MHz,  $\text{CDCl}_3$ )  $\delta$  200.6, 200.5, 193.2, 193.1, 138.1, 137.7, 137.0, 137.2, 134.1, 134.0, 133.9, 129.5, 129.4, 129.0, 128.9, 128.8, 128.7, 128.6, 128.5, 72.5, 71.6, 47.4, 47.3, 29.1, 28.7, 18.9, 18.5. IR 3065, 2932, 1720, 1677, 1309, 1149, 743  $\text{cm}^{-1}$ . HPLC (Chiralpak AD-H (hexane/iPrOH = 40:60) 0.5  $\text{mLmin}^{-1}$   $\lambda$  = 220 nm)  $t_R$  = 16.8 (minor);  $t_R$  = 18.4 (major). HRMS  $\text{C}_{18}\text{H}_{19}\text{SO}_4$  (M+H) Calc: 331.0999; Found: 331.1000.

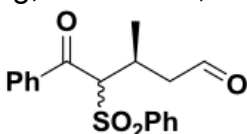

**(3S)-3-Ethyl-5-oxo-5-phenyl-4-(phenylsulfonyl)pentanal (9).**<sup>4</sup> Yellow oil (65 mg, 0.19 mmol, 45%), ( $[\alpha]_{\text{D}}^{20}$  = - 7.25 (c = 1,  $\text{CH}_2\text{Cl}_2$ , 66% ee). *Syn:anti* 1:1.  $^1\text{H-NMR}$  (500 MHz,  $\text{CDCl}_3$ )  $\delta$  9.85 (s, 0.5H), 9.71 (s, 0.5H), 7.60 (m, 10H), 5.61 (d, J = 9.4 Hz, 0.5H), 5.36 (d, J = 5.0 Hz, 0.5H), 3.24 (ddd, J = 19.1, 10.0, 4.8 Hz, 1H), 3.10 (dd, J = 19.1, 3.8 Hz, 0.5H), 2.92 (m, 0.5H), 2.82 (d, J = 5.3 Hz, 0.5H), 2.52 (dd, J = 18.9, 7.8 Hz, 0.5H), 1.52 (m, 2H), 0.88 (t, J = 7.4 Hz, 1.5H), 0.82 (t, J = 7.4 Hz, 1.5H);  $^{13}\text{C-NMR}$  (126 MHz,  $\text{CDCl}_3$ )  $\delta$  201.0, 200.8, 193.3, 193.0, 138.3, 137.9, 137.3, 137.1, 134.2, 134.1, 133.9, 134.0, 129.5, 129.3, 129.1, 128.9, 128.8, 128.7, 128.5, 128.4, 70.76, 70.09, 44.55, 42.82, 35.38, 34.52, 25.65, 24.29, 11.50,

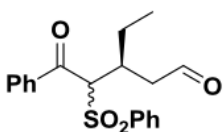

11.27. IR 3066, 2938, 1720, 1678, 1310, 1149, 744  $\text{cm}^{-1}$ . HPLC (Chiralpak AD-H (hexane/iPrOH = 40:60)  $0.5 \text{ mLmin}^{-1}$   $\lambda = 220 \text{ nm}$ )  $t_R = 60.6$  (major)  $t_R = 66.4$  (minor) HRMS  $\text{C}_{19}\text{H}_{21}\text{SO}_4$  (M+H) Calc: 345.1155; Found: 345.1156.

**(2S,3S)-Ethyl-2-acetyl-5-oxo-3-phenylpentanoate (10)**.<sup>5</sup> Yellow oil, (77 mg, 0.294

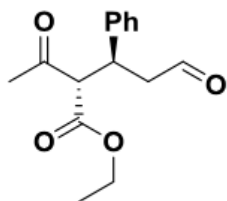

mmol, 70%).  $[\alpha]_D^{20} = + 8.5$  ( $c = 1$ ,  $\text{CH}_2\text{Cl}_2$ , 28% ee).  $^1\text{H-NMR}$  (500 MHz,  $\text{CDCl}_3$ )  $\delta$  9.54 (m, 1H), 7.22 (m, 5H), 3.99 (m, 2H), 3.89 (dd,  $J = 3.4, 2.8 \text{ Hz}$ , 1H), 3.86 (d,  $J = 0.7 \text{ Hz}$ , 1H), 2.80 (m, 1H), 2.75 (m, 1H), 2.22 (d,  $J = 0.5 \text{ Hz}$ , 3H), 0.93 (td,  $J = 7.1, 0.7 \text{ Hz}$ , 3H).  $^{13}\text{C-NMR}$  (126 MHz,  $\text{CDCl}_3$ )  $\delta$  201.8, 200.3, 167.6, 140.0, 128.6, 128.3, 128.1, 128.0, 127.4, 65.28, 61.46, 47.57,

38.95, 29.76, 13.65. IR 2975, 2927, 1710, 1619, 1368, 1272, 1074, 1016, 760, 701  $\text{cm}^{-1}$ . HPLC (Chiralpak AD-H (hexane/iPrOH = 95:5)  $1.0 \text{ mLmin}^{-1}$   $\lambda = 254 \text{ nm}$ )  $t_R = 15.6$  (major);  $t_R = 17.7$  (minor). HRMS  $\text{C}_{15}\text{H}_{19}\text{O}_4$  (M+H) Calc: 263.1278; Found: 263.1279.

**Ethyl (2S,3S)-2-acetyl-3-(4-methoxyphenyl)-5-oxopentanoate (11)**. Yellow oil,

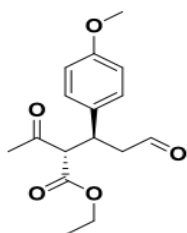

(53 mg, 0.18 mmol, 43%).  $[\alpha]_D^{20} = + 19.9$  ( $c = 1$ ,  $\text{CH}_2\text{Cl}_2$ , 94% ee).  $^1\text{H-NMR}$  (400 MHz,  $\text{CDCl}_3$ )  $\delta$  9.63 – 9.50 (m, 1H), 7.15 (ddd,  $J = 6.3, 4.7, 2.8 \text{ Hz}$ , 2H), 6.84 – 6.80 (m, 2H), 4.29 – 4.10 (m, 2H), 3.95 – 3.92 (m, 1H), 3.87 (dd,  $J = 10.4, 2.9 \text{ Hz}$ , 1H), 3.77 (d,  $J = 2.0 \text{ Hz}$ , 3H), 2.85 – 2.78 (m, 1H), 2.78 – 2.72 (m, 1H), 2.33 – 2.17 (m, 3H), 1.27 (s, 3H);  $^{13}\text{C-NMR}$  (126 MHz,  $\text{CDCl}_3$ )  $\delta$  201.9, 200.5, 167.6, 158.7, 131.9, 129.1, 129.1, 128.4, 114.0, 65.53, 61.45, 55.17,

47.68, 38.24, 29.78, 13.75. IR 2932, 2836, 1720, 1614, 1512, 1283, 1245, 1176, 1021, 834, 733  $\text{cm}^{-1}$ . HPLC (Chiralpak AD-H (hexane/iPrOH = 95:5)  $1.0 \text{ mLmin}^{-1}$   $\lambda = 254 \text{ nm}$ )  $t_R = 23.0$  (minor);  $t_R = 25.9$  (major). HRMS  $\text{C}_{16}\text{H}_{21}\text{O}_5$  (M+H) Calc: 293.1384; Found: 293.1381.

**(S)-4-Acetyl-5-oxo-3-phenylhexanal (12)**.<sup>6</sup> White solid, mp 88-87  $^\circ\text{C}$  (hexane), (39

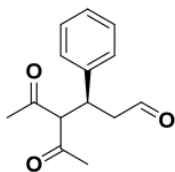

mg, 0.168 mmol, 40%).  $[\alpha]_D^{25} = + 23.1$  ( $c = 0.6$ ,  $\text{CHCl}_3$ , 89% ee).  $^1\text{H-NMR}$  (500 MHz,  $\text{CDCl}_3$ )  $\delta$  9.56 (dd,  $J = 2.1, 1.3 \text{ Hz}$ , 1H), 7.26 (m, 5H), 4.20 (d,  $J = 11.0 \text{ Hz}$ , 1H), 4.05 (s, 1H), 2.71 (m, 2H), 2.23 (s, 3H), 1.87 (s, 3H).  $^{13}\text{C-NMR}$  (126 MHz,  $\text{CDCl}_3$ )  $\delta$  30.0, 30.3, 40.0, 48.0, 74.4, 127.8, 2C(128.0), 2C(129.2), 139.8, 200.1, 202.6, 202.9 IR. 3394, 3029, 2836, 2737, 1682, 1358, 1165, 706  $\text{cm}^{-1}$  HPLC (Chiralcel OJ-H

hexane/iPrOH 90 = 10;  $1.0 \text{ mL/min}$   $\lambda = 220\text{nm}$ );  $t_R = 16.4 \text{ min}$  (minor);  $t_R = 20.8 \text{ min}$  (major). HRMS  $\text{C}_{14}\text{H}_{17}\text{O}_3$  (M+H) Calc: 233.1172; Found: 233.1169.

**(S)-4-Acetyl-3-(4-methoxyphenyl)-5-oxohexanal compound with 1-((4R)-2-hydroxy-4-(4-methoxyphenyl)-6-methyl-3,4-dihydro-2H-pyran-5-yl)ethanone**

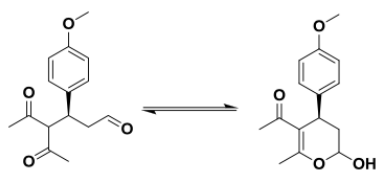

**(13)**. White solid, mp 77-80 °C (hexane), (55 mg, 0.21 mmol, 50%).  $[\alpha]_D^{25} = +42.0$  (c = 0.6, CHCl<sub>3</sub>, 80% ee). <sup>1</sup>H-NMR (500 MHz, CDCl<sub>3</sub>) δ 9.54 (m, 0.5H), 7.09 (m, 2H), 6.82 (m, 2H), 5.13 (d, J = 8.2 Hz, 0.5H), 4.92 (m, 0.5H), 4.47 (s, 1H), 4.15 (d, J = 11.0 Hz, 0.5H), 4.00 (m, 1H), 3.77 (m, 2H), 3.24 (m, 0.5H), 2.90 (d, J = 11.9 Hz, 0.5H), 2.66 (ddd, J = 6.9, 6.1, 1.8 Hz, 1H), 2.25 (m, 3H), 1.86 (t, J = 55.1 Hz, 3H). <sup>13</sup>C-NMR (126 MHz, CDCl<sub>3</sub>) δ 214.6, 202.9, 202.8, 202.0, 200.3, 159.0, 133.3, 131.6, 129.2, 128.8, 128.4, 114.6, 114.3, 95.4, 74.5, 68.8, 62.3, 55.3, 48.1, 41.1, 39.1, 37.5, 36.2, 33.2, 31.0, 30.3, 29.9, 29.0, 28.6, 20.8. IR 3449, 2993, 2929, 2834, 2745, 1684, 1610, 1511 cm<sup>-1</sup>. HPLC (Chiralcel OJ-H hexane/iPrOH 90 = 10; 1.0 mL/min λ = 220nm); t<sub>R</sub> = 20.7 min (minor); t<sub>R</sub> = 24.6 min (major). HRMS C<sub>15</sub>H<sub>18</sub>O<sub>4</sub>Na (M+Na) Calc: 285.1097; Found: 285.1098.

**(2R,3S)-1,2,3-triphenylpentan-1-one (19)**.<sup>7</sup> White solid, mp 166-168 °C (hexane).

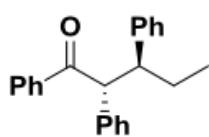

$[\alpha]_D^{25} = -8.8$  (c = 1, CH<sub>2</sub>Cl<sub>2</sub>), (21 mg, 0.068 mmol, 50%). <sup>1</sup>H-NMR (500 MHz, CDCl<sub>3</sub>) δ 7.29 (m, 15H), 4.84 (d, J = 10.9 Hz, 1H), 3.39 (td, J = 10.6, 4.2 Hz, 1H), 1.35 (m, 2H), 0.53 (t, J = 7.3 Hz, 3H). <sup>13</sup>C-NMR (126 MHz, CDCl<sub>3</sub>) δ 199.6, 143.5, 2C(138.0), 137.6, 132.6, 129.2, 129.0, 128.8, 128.7, 128.5, 128.4, 128.3, 128.35, 127.4, 126.3, 60.0, 50.5, 26.5, 11.8. IR 3055, 2960, 2925, 2855, 1675, 1540, 1400, 695 cm<sup>-1</sup>. HPLC (Chiralpak AD-H hexano/iPrOH 97 = 3; 0.7 mL/min λ = 254nm); t<sub>R</sub> = 13.4 min (minor); t<sub>R</sub> = 14.7 min (major).

## 2. References

- [1] Guevara-Pulido, J.; Andrés, J. M.; Pedrosa, R. *J. Org. Chem.* **2014**, *79*, 8638-8644.
- [2] Guevara-Pulido, J.; Andrés, J. M.; Pedrosa, R. *RSC Advances* **2015**, *5*, 65975-65981.
- [3] Enders, D.; Grossmann, A.; Huang, H.; Raabe, G. *Eur. J. Org. Chem.* **2011**, 4298-4301.
- [4] Arpa, E. M.; Frias, M.; Alvarado, C.; Aleman, J.; Diaz-Tendero, S. *J. Mol. Catal. A Chem.* **2016**, *423*, 308-318.
- [5] Guo, Y.; Xia, A.; Meng, C.; Xu, Z.; Xu, D.. *Green Chem.* **2017**, *19*, 2546-2549.
- [6] Blanco, V.; Leigh, D. A.; Lewandowska, U.; Lewandowski, B.; Marcos, V. *J. Am. Chem. Soc.* **2014**, *136*, 15775-15780.
- [7] (a) Auerbach, R. A.; Kingsbury, C. A. *Tetrahedron* **1973**, *29*, 1457-1464. (b) Zimmerman, H. E.; Chang, W-H. *J. Am. Chem. Soc.* **1958**, *81*, 3634-3643.







F-42\_1\_PROTON\_01

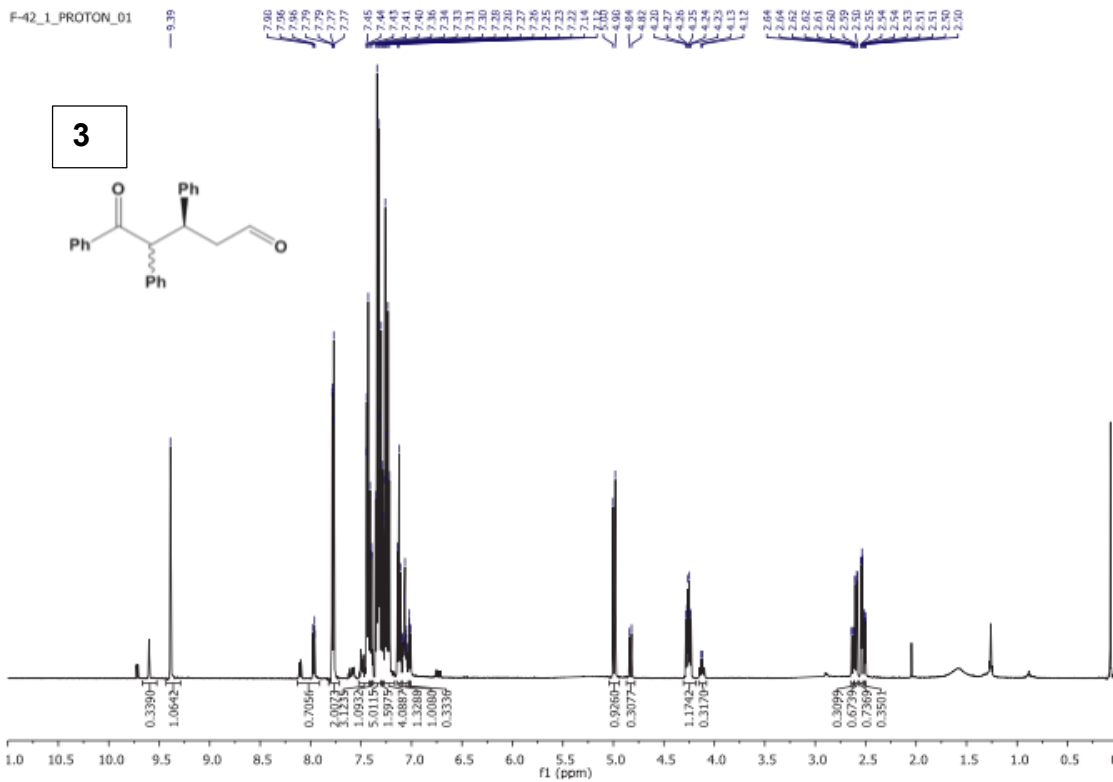

F-42\_1\_CARBON\_01

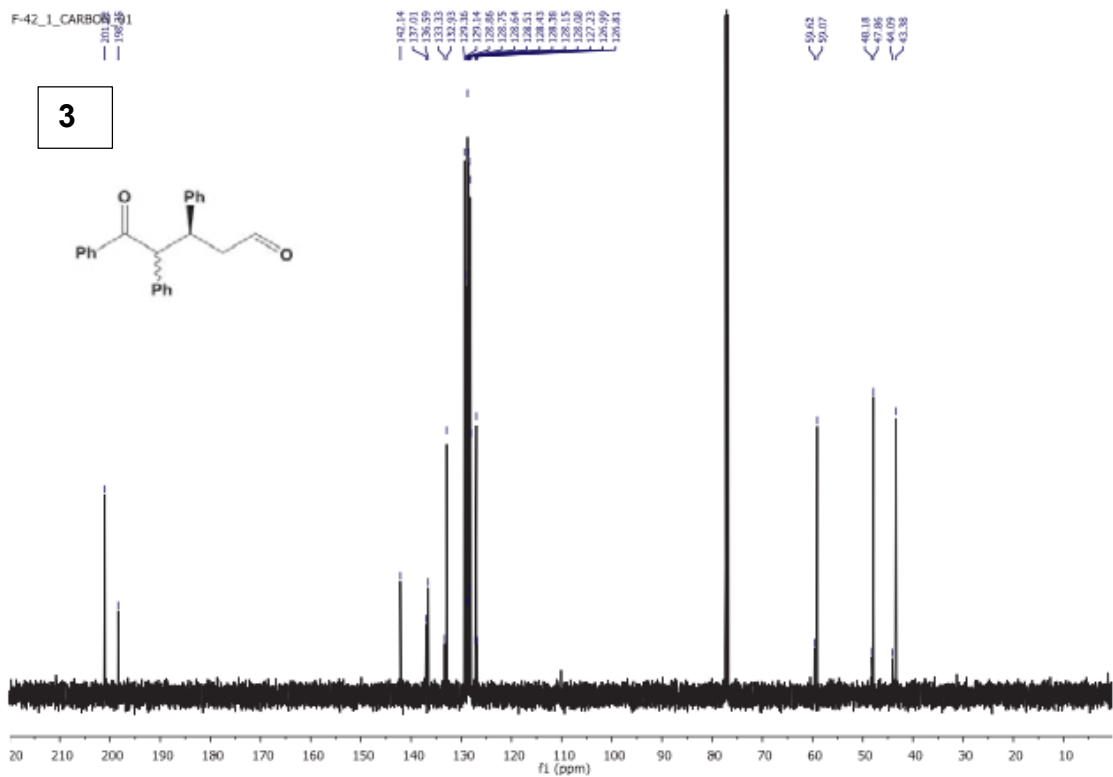

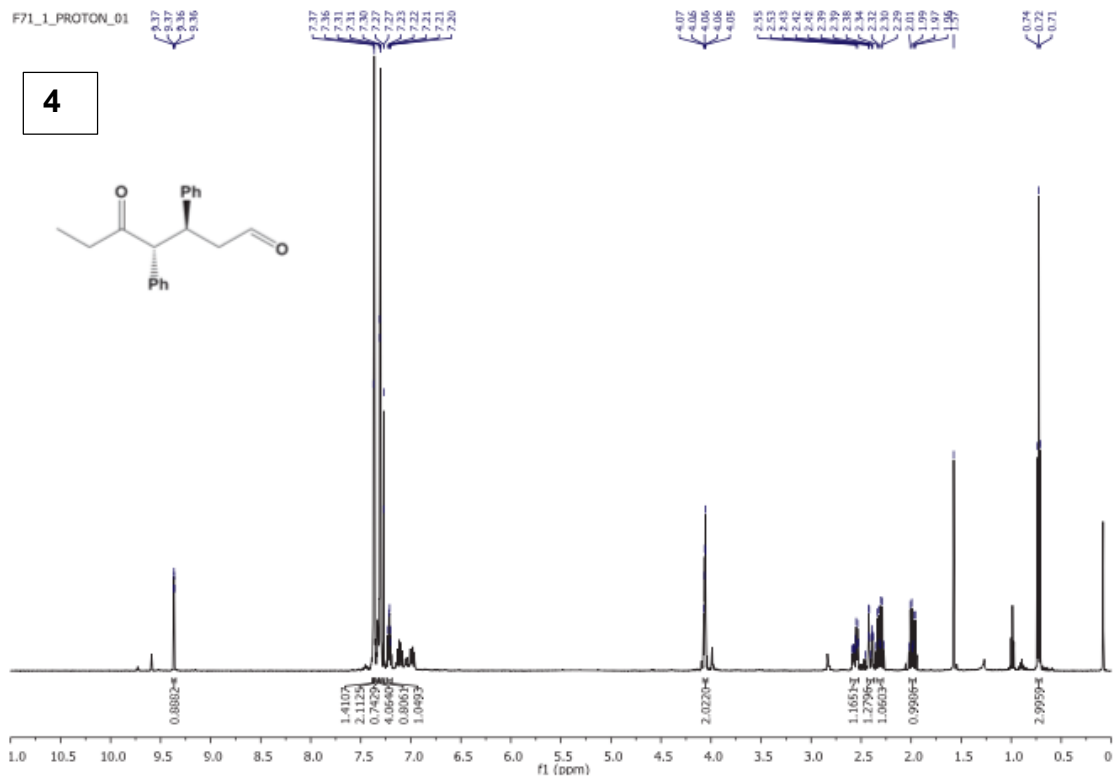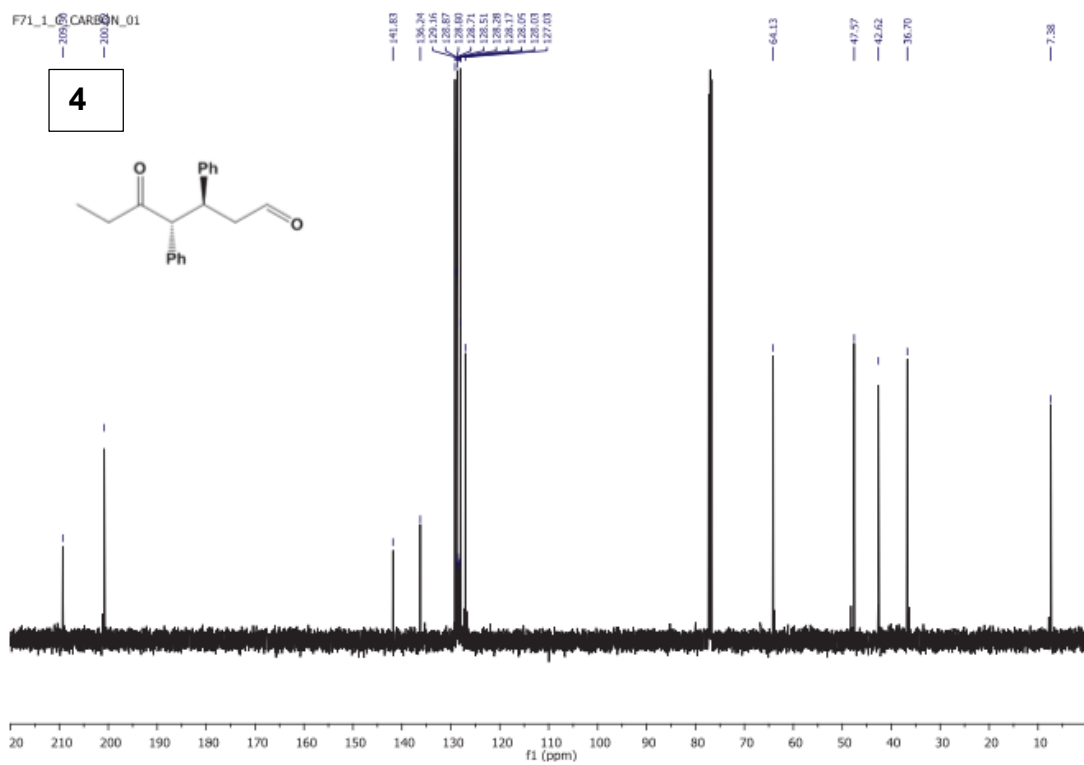

F72\_3\_PROTON\_01

5

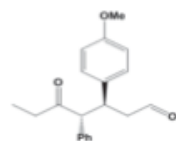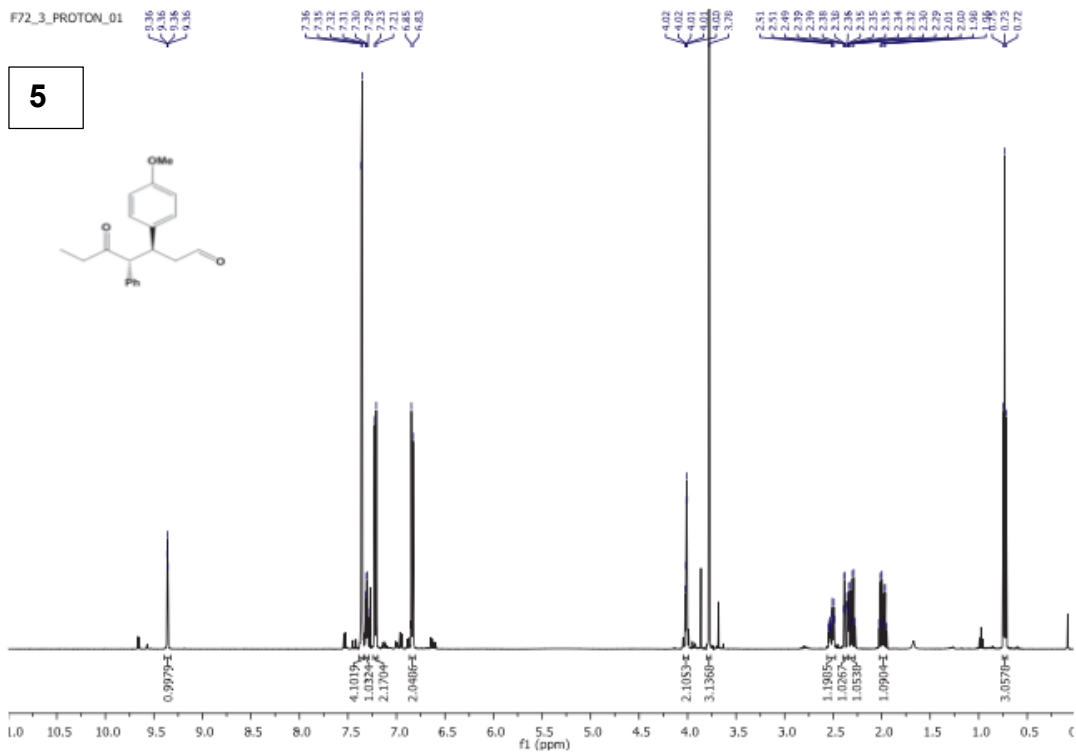

5

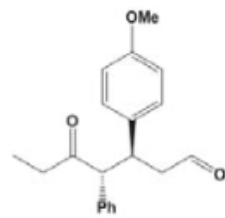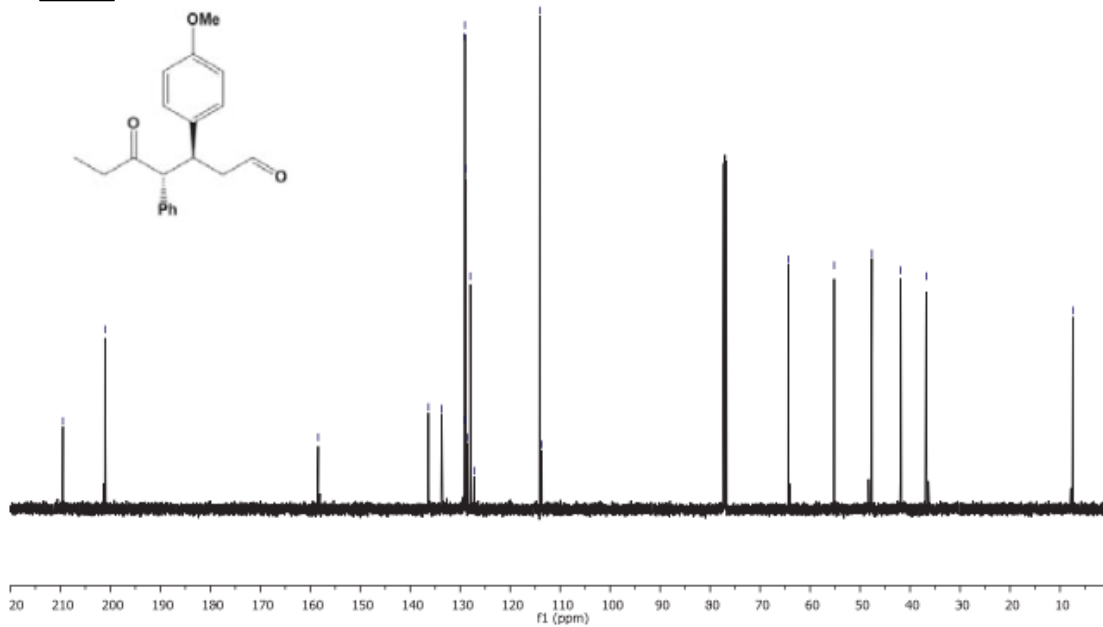

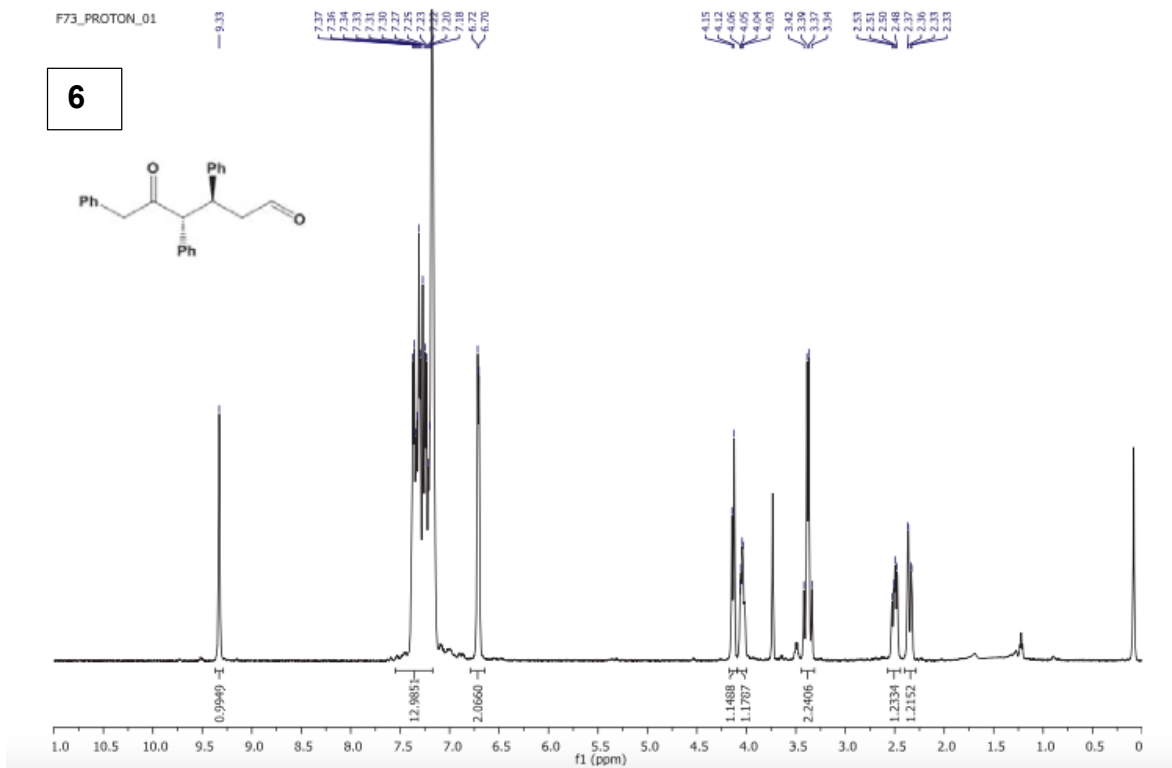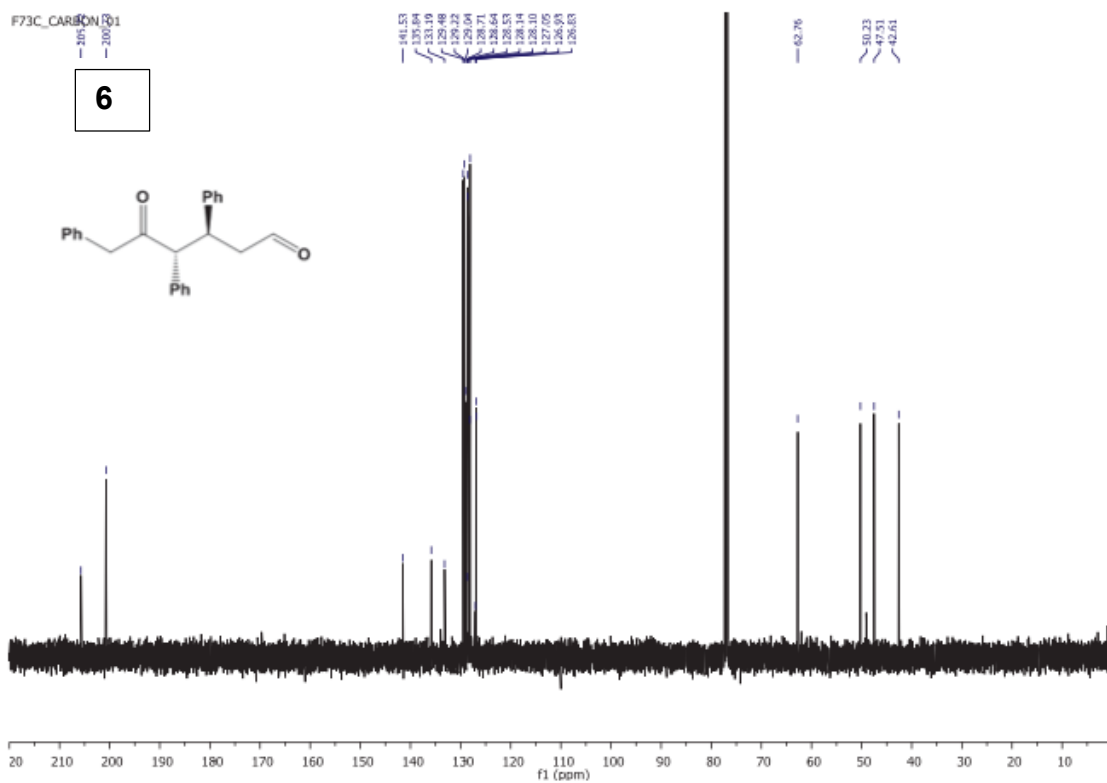

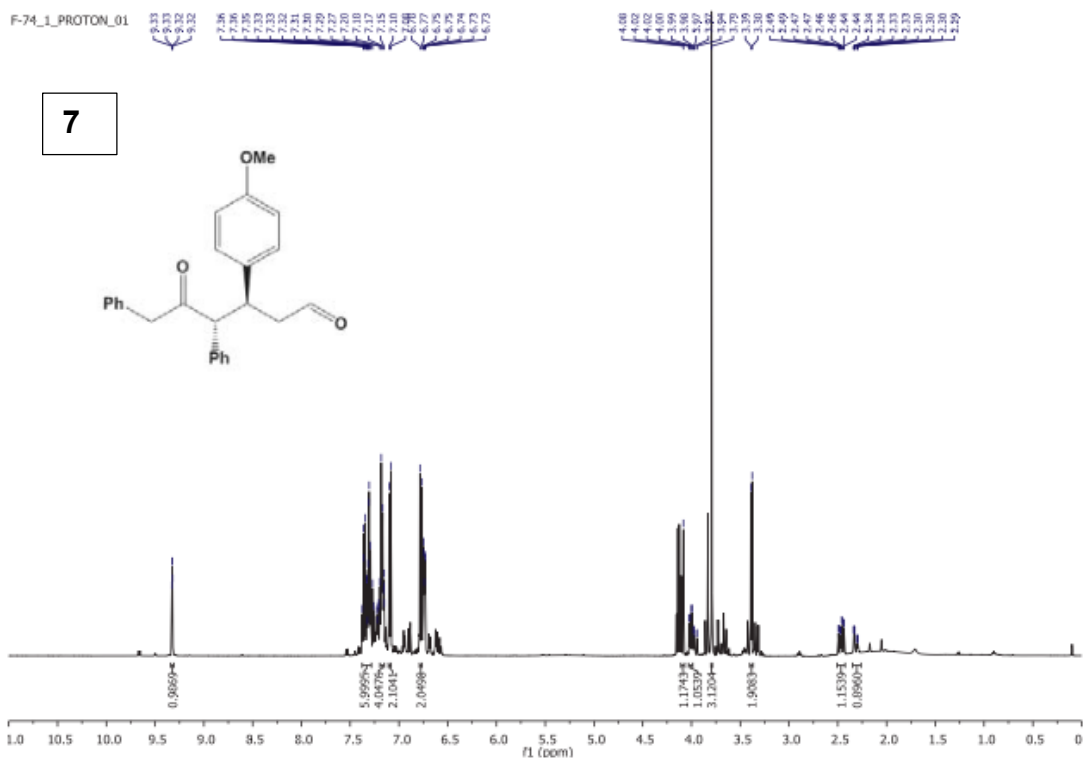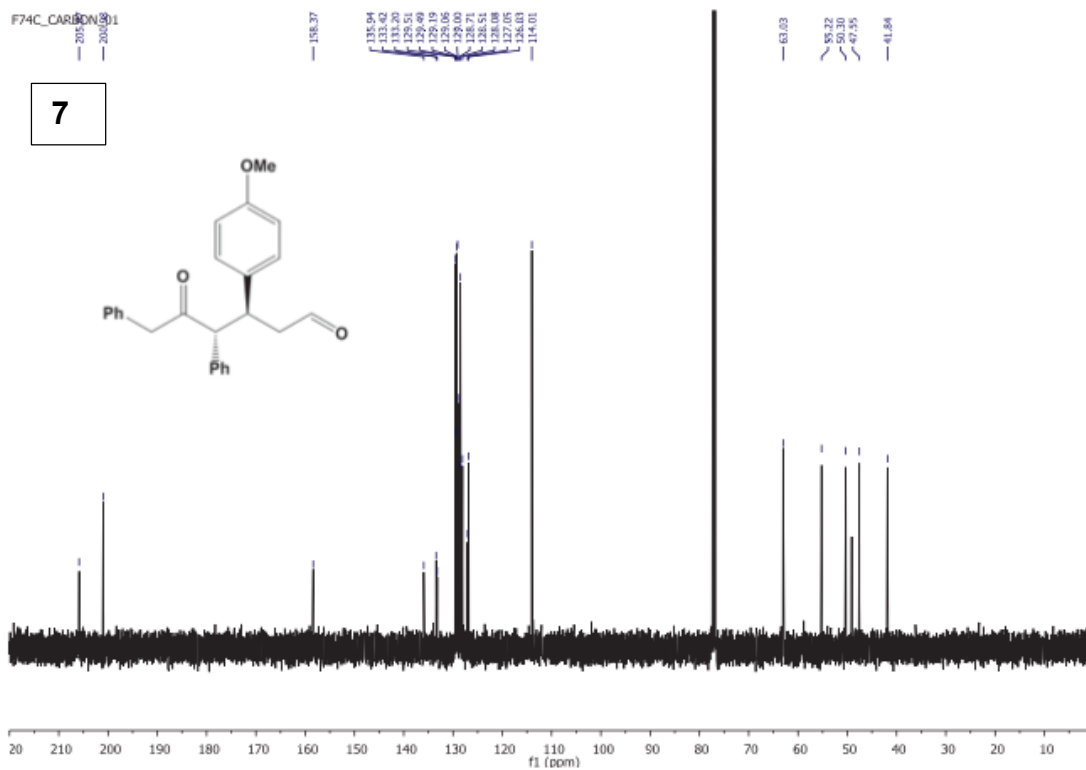





F-81\_2\_PROTON\_01

|      |      |      |      |      |      |      |      |      |      |      |      |      |      |      |      |      |      |      |      |      |      |      |      |      |      |      |      |      |      |      |      |      |      |      |      |      |      |      |      |      |      |      |      |      |      |      |      |      |      |      |      |      |      |      |      |      |      |      |      |      |      |      |      |      |      |
|------|------|------|------|------|------|------|------|------|------|------|------|------|------|------|------|------|------|------|------|------|------|------|------|------|------|------|------|------|------|------|------|------|------|------|------|------|------|------|------|------|------|------|------|------|------|------|------|------|------|------|------|------|------|------|------|------|------|------|------|------|------|------|------|------|------|
| 8.00 | 7.83 | 7.82 | 7.81 | 7.77 | 7.75 | 7.75 | 7.74 | 7.74 | 7.74 | 7.59 | 7.58 | 7.56 | 7.54 | 7.52 | 7.51 | 7.49 | 7.47 | 7.47 | 7.46 | 7.45 | 7.41 | 7.39 | 7.39 | 7.36 | 7.27 | 5.82 | 5.80 | 5.36 | 3.27 | 3.26 | 3.25 | 3.24 | 3.22 | 3.21 | 3.20 | 3.17 | 3.16 | 3.00 | 3.00 | 2.92 | 2.92 | 2.92 | 2.83 | 2.82 | 2.82 | 2.55 | 2.55 | 2.51 | 2.49 | 1.45 | 1.45 | 1.50 | 1.50 | 1.56 | 1.56 | 1.53 | 1.52 | 1.52 | 1.52 | 1.58 | 1.58 | 0.86 | 0.83 | 0.82 | 0.82 |
|------|------|------|------|------|------|------|------|------|------|------|------|------|------|------|------|------|------|------|------|------|------|------|------|------|------|------|------|------|------|------|------|------|------|------|------|------|------|------|------|------|------|------|------|------|------|------|------|------|------|------|------|------|------|------|------|------|------|------|------|------|------|------|------|------|------|

9

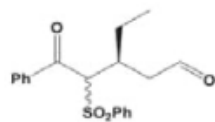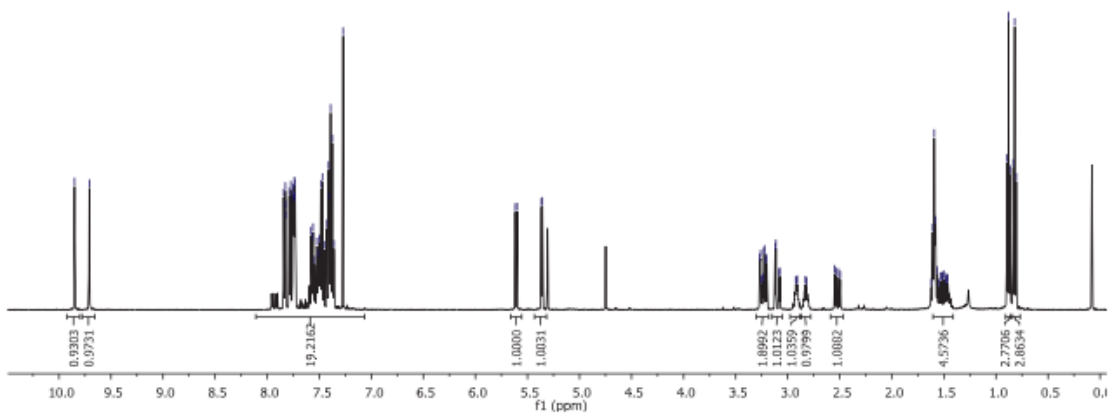

F-81\_2\_CARBON\_01

9

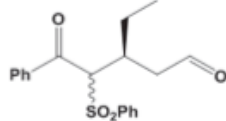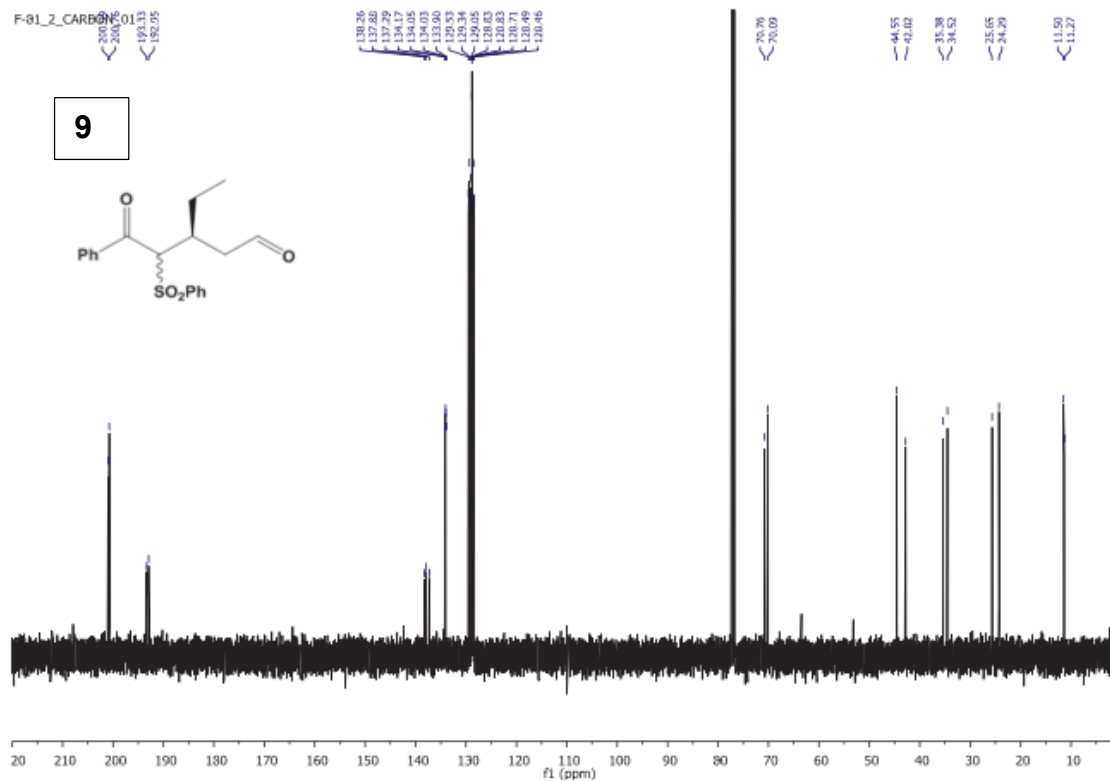

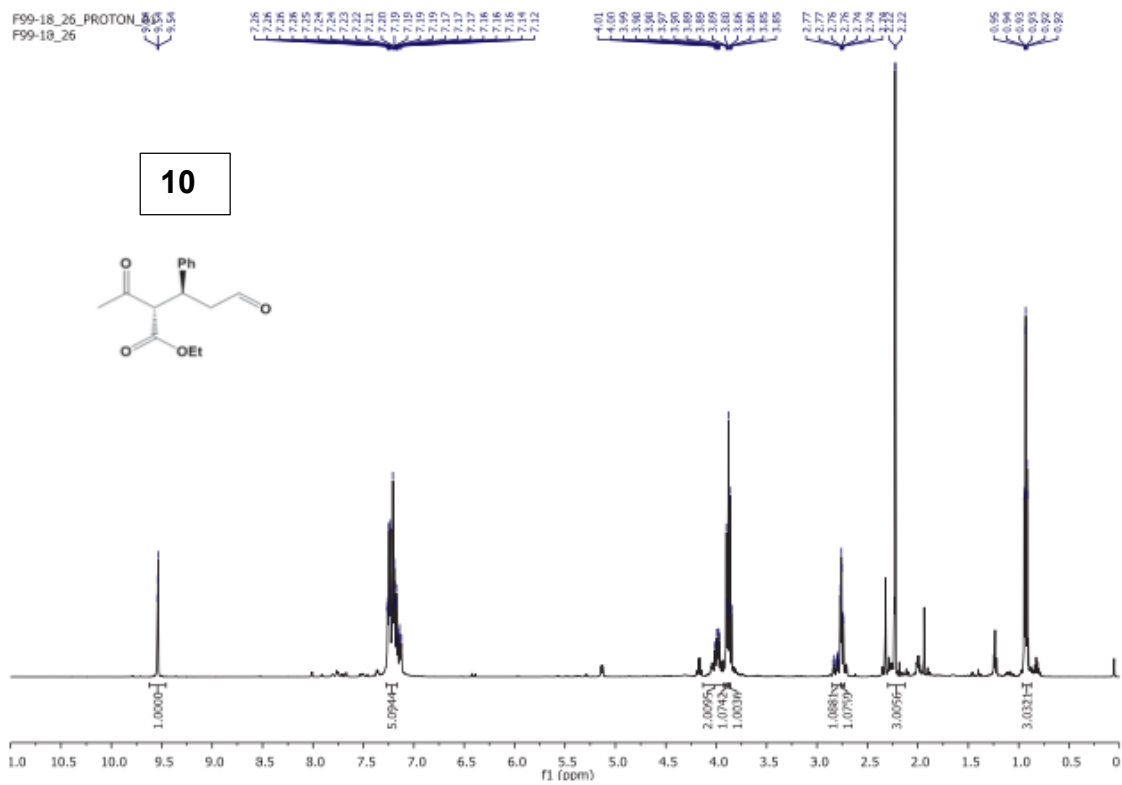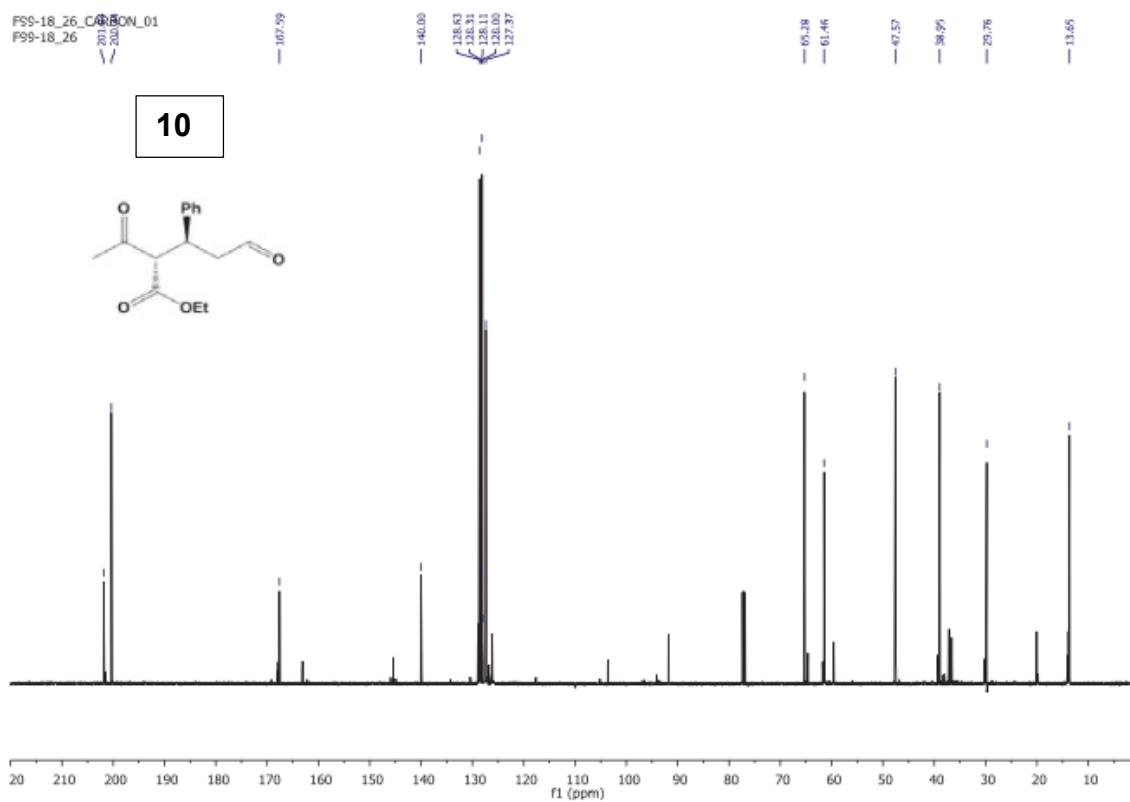



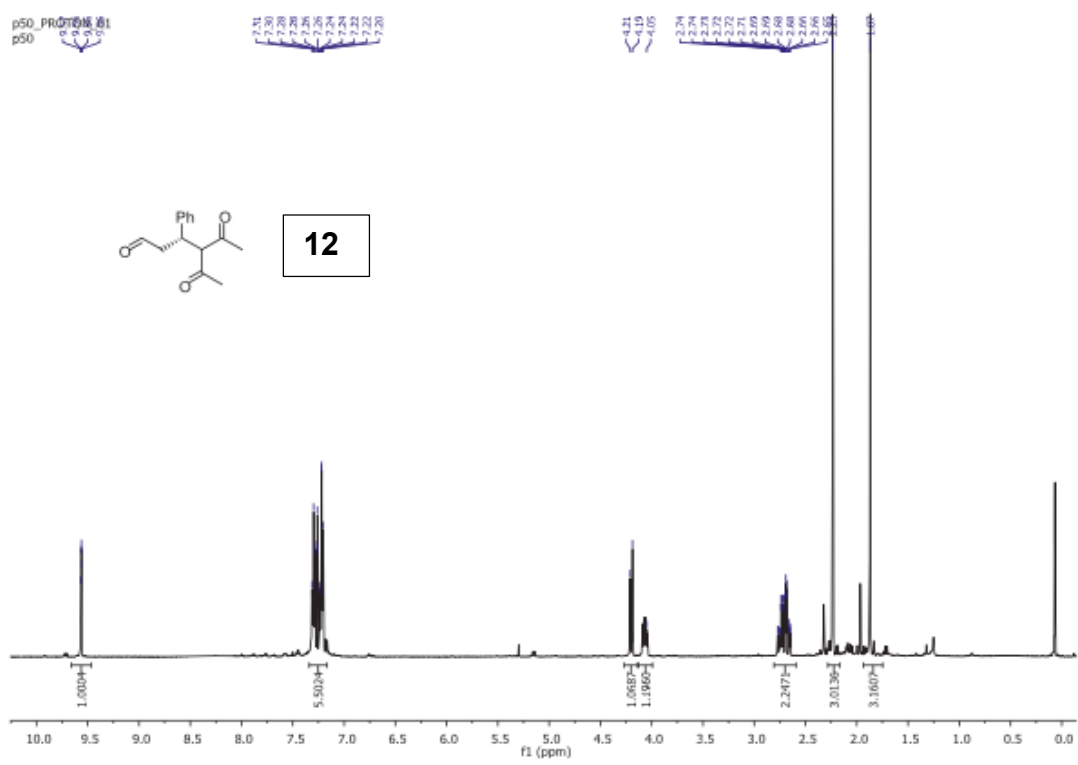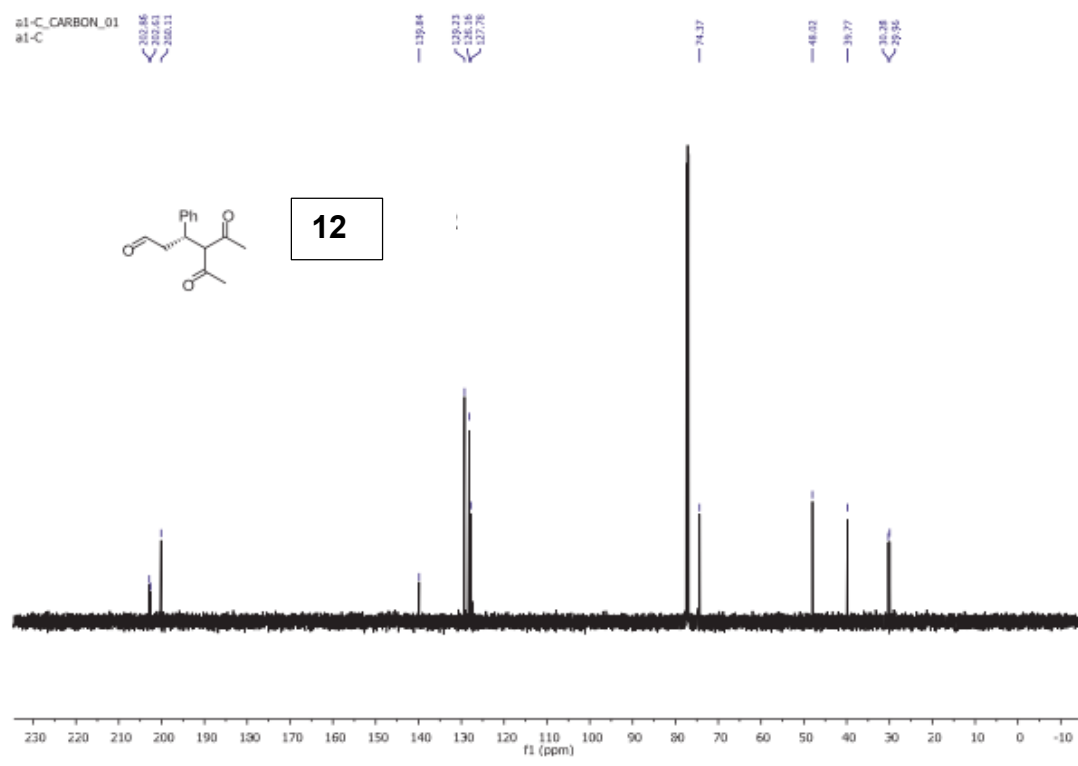

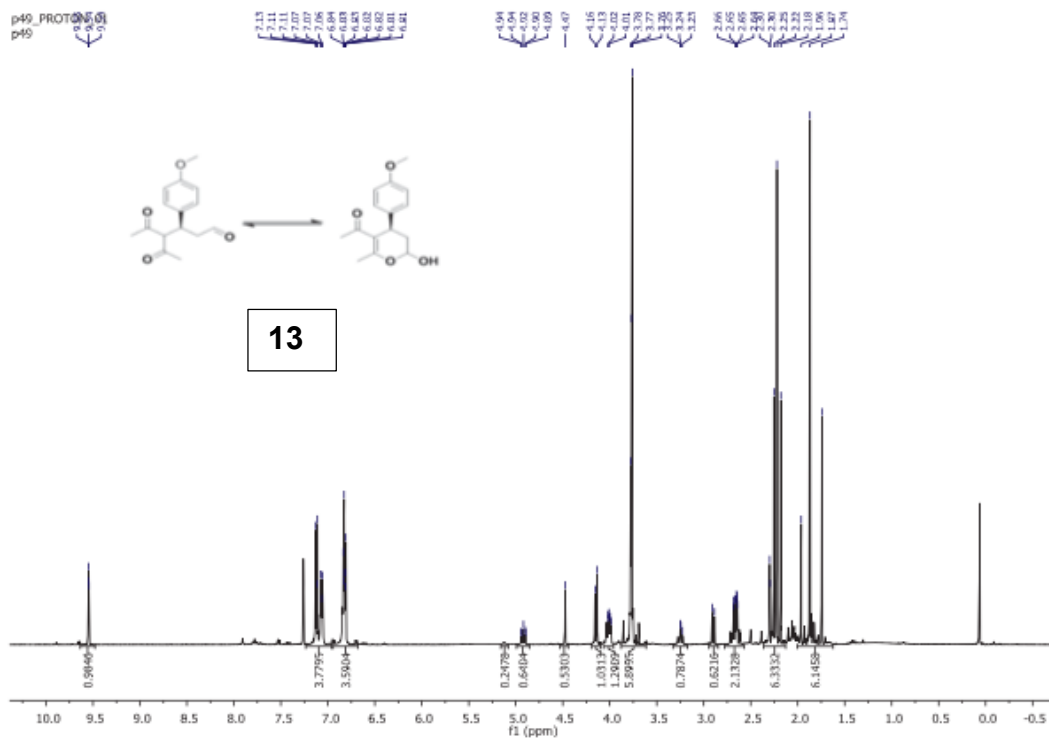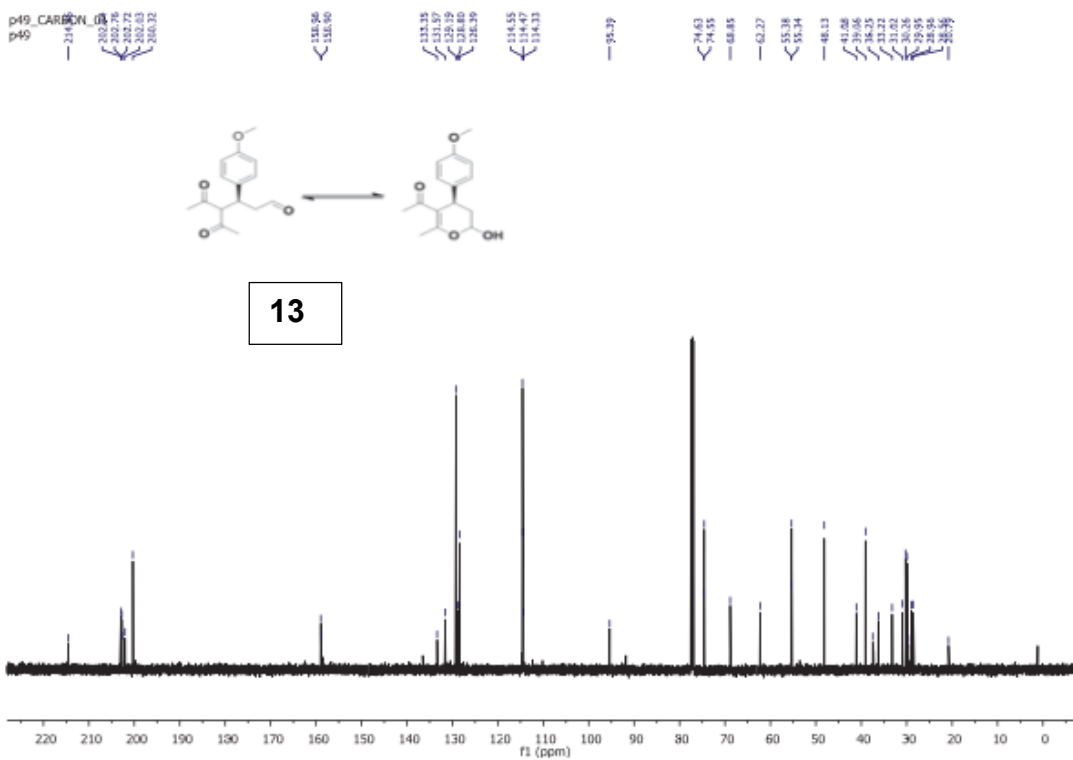

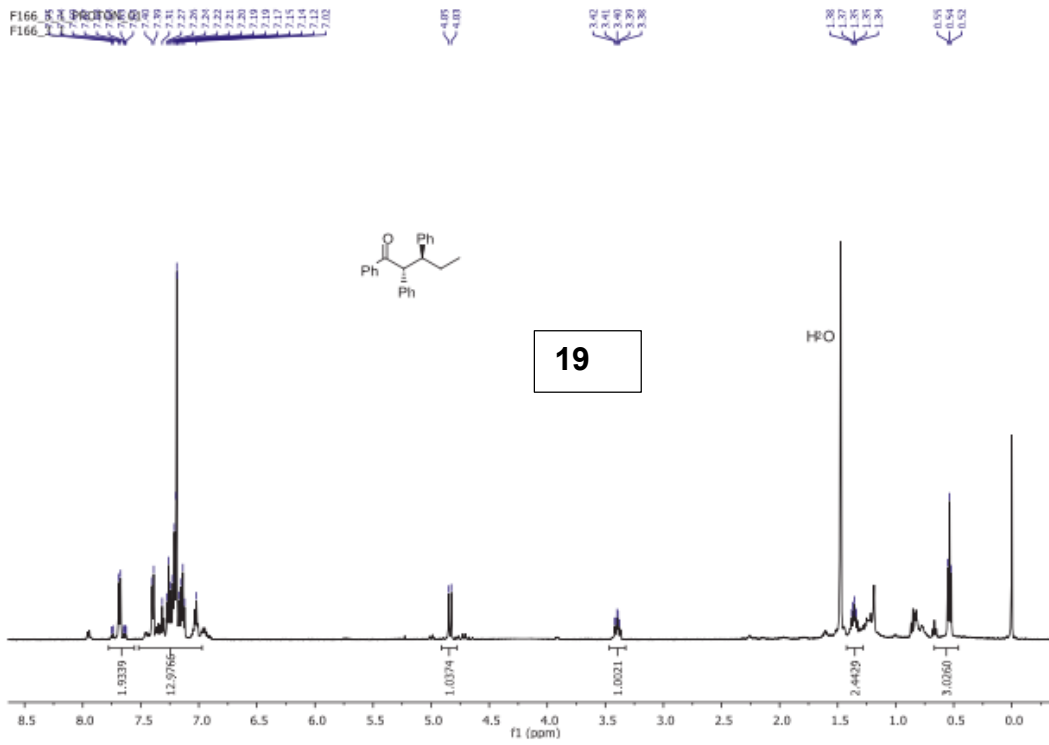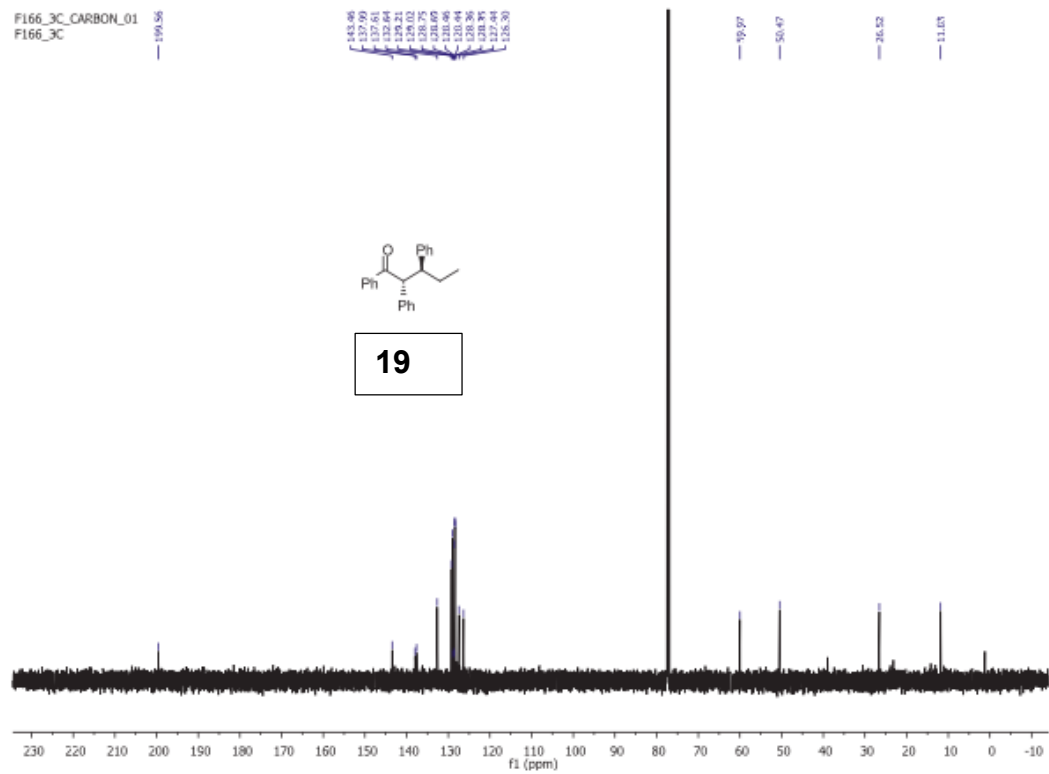

### 3. HPLC Chromatograms

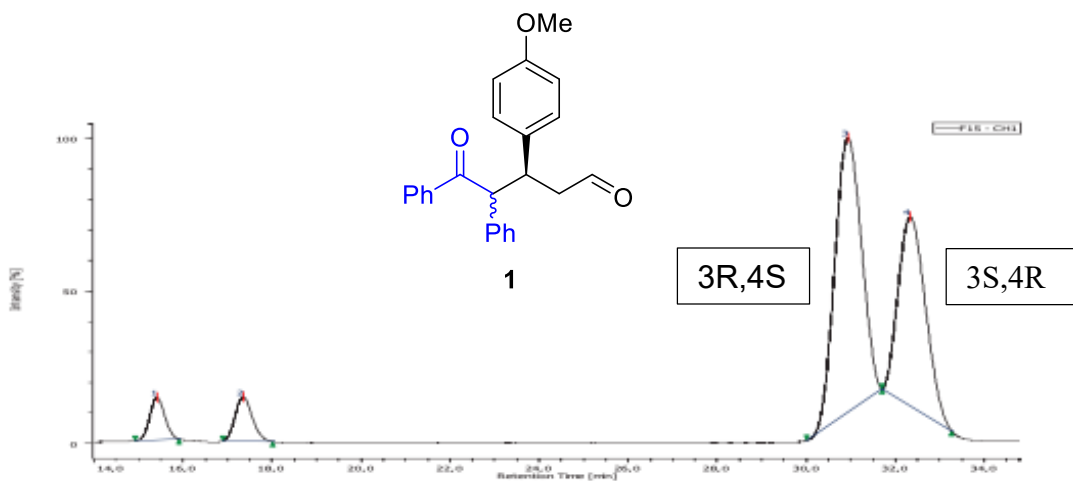

| Peak | tR     | Area    | Height | Area%  | Height% | Symmetry |
|------|--------|---------|--------|--------|---------|----------|
| 1    | 15,417 | 146238  | 6246   | 4,579  | 7,700   | 1,067    |
| 2    | 17,350 | 175321  | 6517   | 5,490  | 8,034   | 1,149    |
| 3    | 30,917 | 1684049 | 40490  | 52,730 | 49,913  | 1,026    |
| 4    | 32,317 | 1188118 | 27868  | 37,202 | 34,354  | 1,201    |

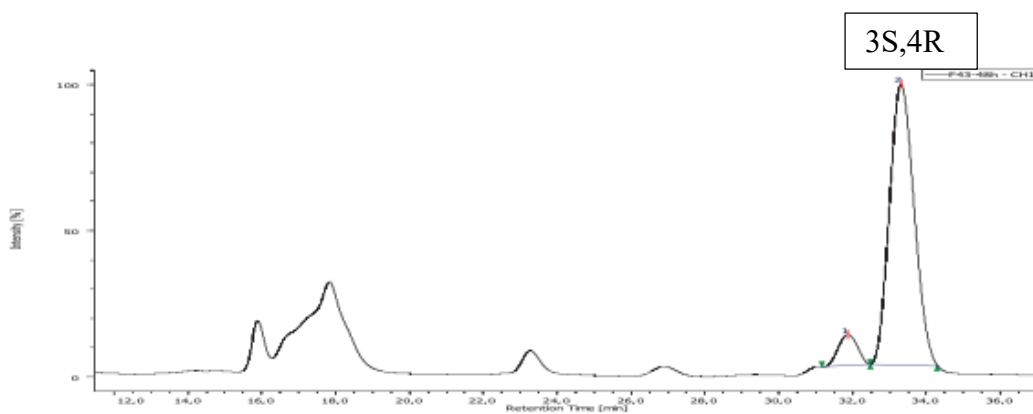

| Peak | tR     | Area    | Height | Area%  | Height% | Symmetry |
|------|--------|---------|--------|--------|---------|----------|
| 1    | 31,842 | 124523  | 3480   | 7,843  | 9,886   | 0,988    |
| 2    | 33,283 | 1463092 | 31722  | 92,157 | 90,114  | 1,115    |

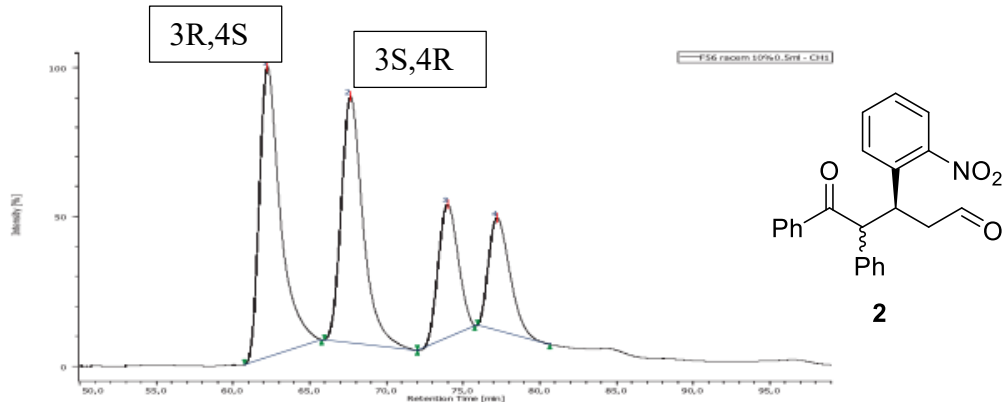

| tR     | Area    | Height | Area%  | Height% | NTP   | Resolution | Symmetry Factor |
|--------|---------|--------|--------|---------|-------|------------|-----------------|
| 62,242 | 4369056 | 45563  | 37,117 | 37,161  | 11380 | 2,259      | 1,680           |
| 67,650 | 3824967 | 38671  | 32,495 | 31,539  | 12021 | 2,569      | 1,402           |
| 73,967 | 1880783 | 20823  | 15,978 | 16,983  | 14445 | 1,284      | 1,101           |
| 77,192 | 1696256 | 17554  | 14,410 | 14,317  | 14381 | N/A        | 1,411           |

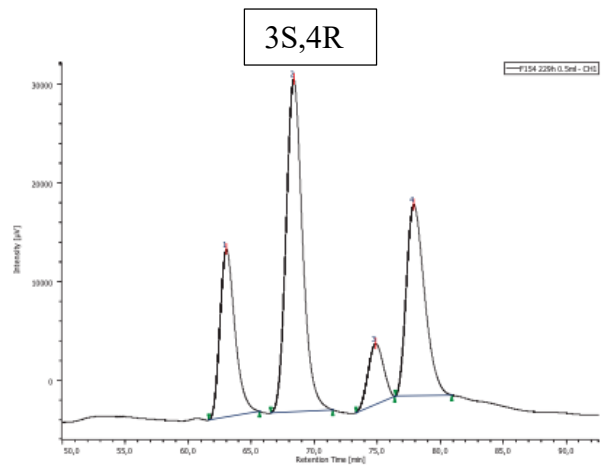

| Peak Name | tR     | Area    | Height | Area%  | Height% | NTP   | Resolution | Symmetry Factor |
|-----------|--------|---------|--------|--------|---------|-------|------------|-----------------|
| 1         | 63,017 | 1406628 | 16960  | 20,386 | 22,312  | 13837 | 2,388      | 1,357           |
| 2         | 68,342 | 3036868 | 33609  | 44,013 | 44,215  | 13784 | 2,793      | 1,209           |
| 3         | 74,850 | 521888  | 6138   | 7,564  | 8,074   | 16316 | 1,219      | 1,010           |
| 4         | 77,883 | 1934588 | 19307  | 28,038 | 25,399  | 13855 | N/A        | 1,370           |



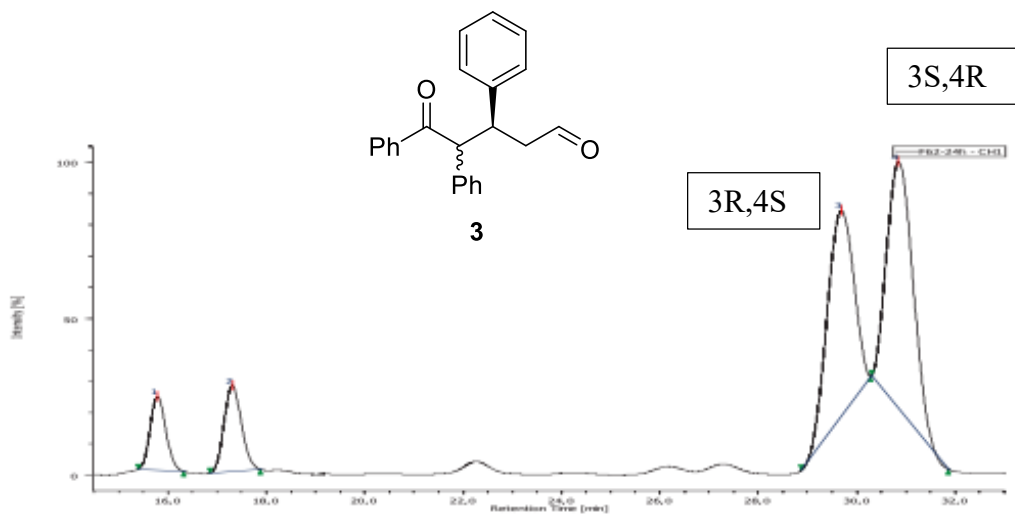

| Peak | tR     | Area   | Height | Area%  | Height% | Symmetry |
|------|--------|--------|--------|--------|---------|----------|
| 1    | 15.792 | 166253 | 7487   | 7.951  | 12.063  | 1.108    |
| 2    | 17.308 | 214082 | 8725   | 10.238 | 14.059  | 1.114    |
| 3    | 29.667 | 780952 | 20852  | 37.348 | 33.600  | 0.938    |
| 4    | 30.825 | 929724 | 24996  | 44.463 | 40.277  | 1.165    |

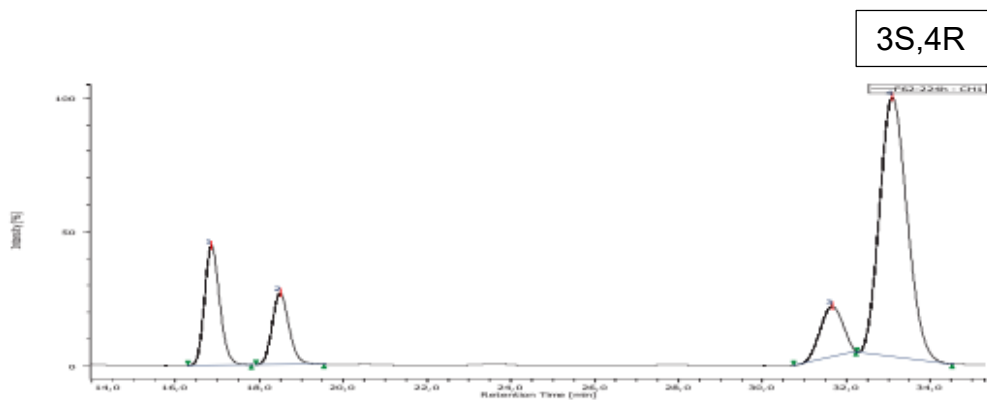

| Peak | tR     | Area    | Height | Area%  | Height% | Symmetry |
|------|--------|---------|--------|--------|---------|----------|
| 1    | 16,858 | 1155221 | 45856  | 16,031 | 23,858  | 1,159    |
| 2    | 18,492 | 769135  | 27452  | 10,673 | 14,283  | 1,151    |
| 3    | 31,642 | 734199  | 19398  | 10,188 | 10,092  | 0,935    |
| 4    | 33,075 | 4547663 | 99496  | 63,107 | 51,766  | 1,148    |

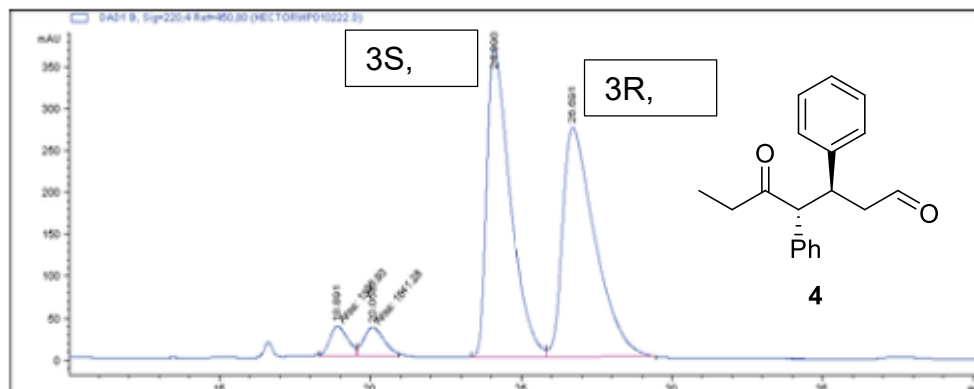

| Peak | Time   | Area    | Height | Width  | Area%  | Symmetry |
|------|--------|---------|--------|--------|--------|----------|
| 1    | 18.891 | 1506.9  | 36     | 0.6969 | 3.433  | 0.742    |
| 2    | 20.058 | 1641.3  | 34.8   | 0.7863 | 3.739  | 0.748    |
| 3    | 24.09  | 20169.2 | 370.4  | 0.7728 | 45.942 | 0.431    |
| 4    | 26.691 | 20583.7 | 274.8  | 1.0052 | 46.886 | 0.428    |

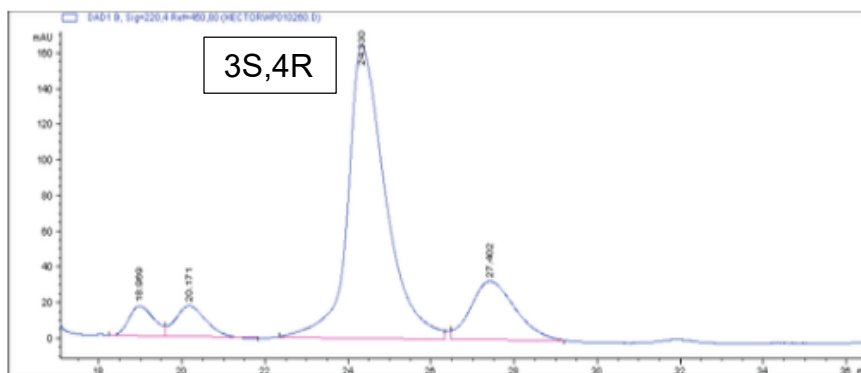

| Peak | Time   | Area    | Height | Width  | Area%  | Symmetry |
|------|--------|---------|--------|--------|--------|----------|
| 1    | 18.969 | 717.3   | 16.9   | 0.5124 | 4.962  | 0.704    |
| 2    | 20.171 | 895.1   | 17.5   | 0.6286 | 6.192  | 0.804    |
| 3    | 24.33  | 10388.1 | 164.2  | 0.8406 | 71.853 | 0.625    |
| 4    | 27.402 | 2456.8  | 32.9   | 0.894  | 16.994 | 0.712    |

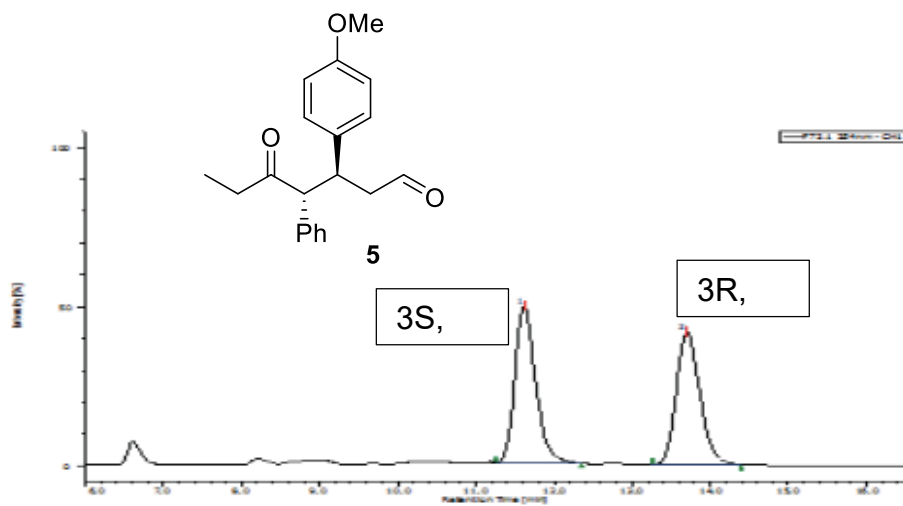

| Peak | tR     | Area   | Height | Area%  | Height% | Symmetry |
|------|--------|--------|--------|--------|---------|----------|
| 1    | 11,608 | 152980 | 8290   | 51,211 | 54,276  | 1,271    |
| 2    | 13,692 | 145748 | 6984   | 48,789 | 45,724  | 1,197    |

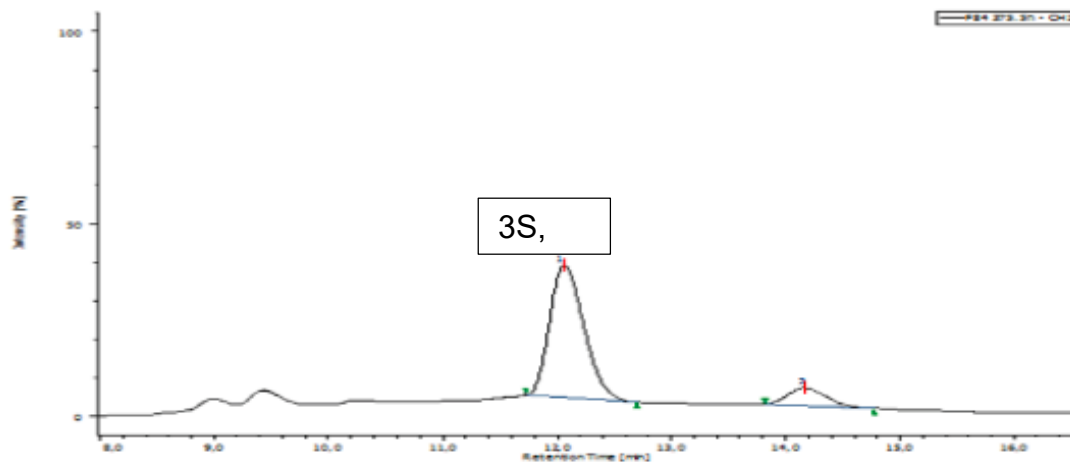

| Peak | tR     | Area   | Height | Area%  | Height% | Symmetry |
|------|--------|--------|--------|--------|---------|----------|
| 1    | 12,058 | 197346 | 9487   | 87,020 | 88,189  | 1,281    |
| 2    | 14,158 | 29436  | 1271   | 12,980 | 11,811  | 1,209    |

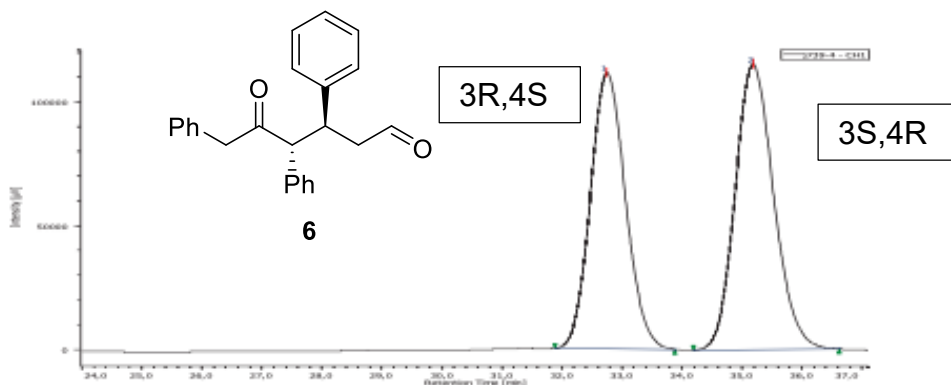

| Peak | tR     | Area    | Height | Area%  | Height% | Symmetry |
|------|--------|---------|--------|--------|---------|----------|
| 1    | 32,742 | 4521136 | 111366 | 47,004 | 49,219  | 1,098    |
| 2    | 35,167 | 5097518 | 114899 | 52,996 | 50,781  | 1,155    |

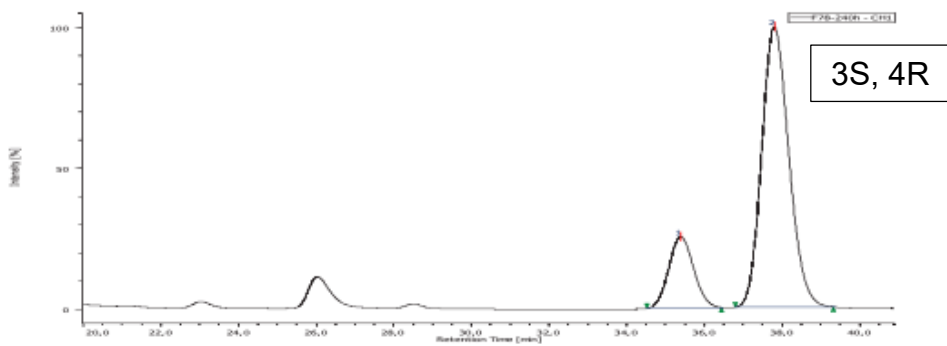

| Peak | tR     | Area    | Height | Area%  | Height% | Symmetry |
|------|--------|---------|--------|--------|---------|----------|
| 1    | 35.375 | 946881  | 21173  | 18.902 | 20.293  | 1.065    |
| 2    | 37.783 | 4062604 | 83163  | 81.098 | 79.707  | 1.154    |

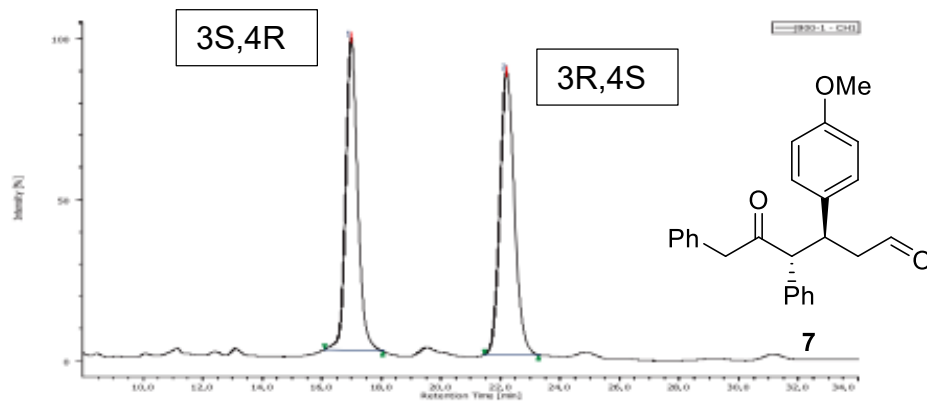

| Peak | tR     | Area    | Height | Area%  | Height% | Symmetry |
|------|--------|---------|--------|--------|---------|----------|
| 1    | 16,975 | 2093289 | 74473  | 47,711 | 52,444  | 1,176    |
| 2    | 22,192 | 2294169 | 67531  | 52,289 | 47,556  | 1,123    |

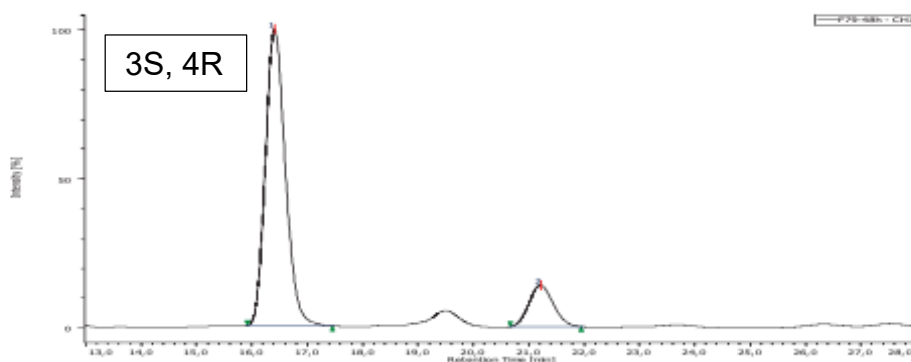

| Peak | tR     | Area     | Height | Area%  | Height% | Symmetry |
|------|--------|----------|--------|--------|---------|----------|
| 1    | 16.400 | 13709580 | 545474 | 85.320 | 87.722  | 1.196    |
| 2    | 21.200 | 2358772  | 76344  | 14.680 | 12.278  | 1.123    |

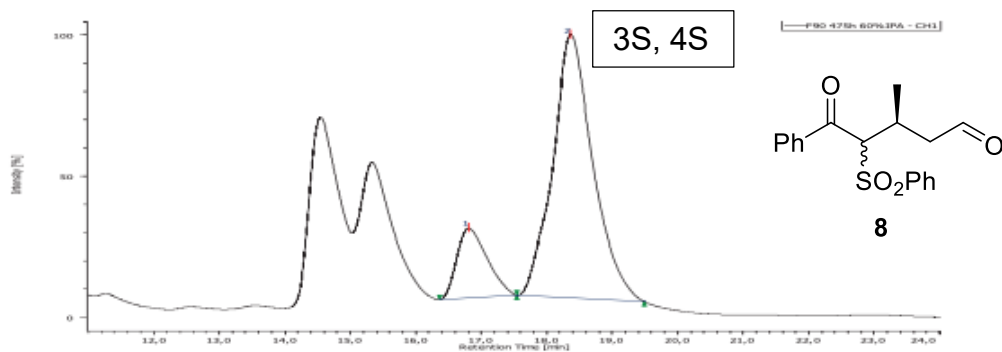

| Peak | tR     | Area    | Height | Area%  | Height% | Symmetry |
|------|--------|---------|--------|--------|---------|----------|
| 1    | 16,800 | 532356  | 16749  | 16,719 | 21,022  | 1,381    |
| 2    | 18,358 | 2651698 | 62927  | 83,281 | 78,978  | 1,144    |

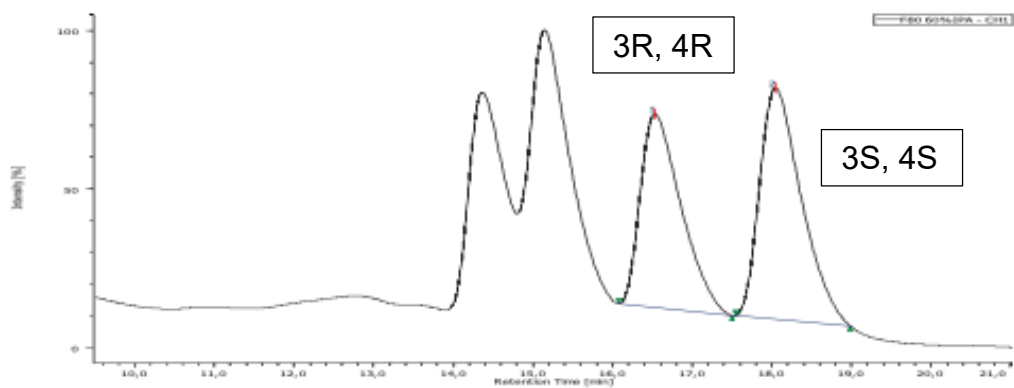

| Peak | tR     | Area   | Height | Area%  | Height% | Symmetry |
|------|--------|--------|--------|--------|---------|----------|
| 1    | 16,525 | 618464 | 17489  | 45,605 | 45,771  | 1,565    |
| 2    | 18,033 | 737658 | 20720  | 54,395 | 54,229  | 1,444    |

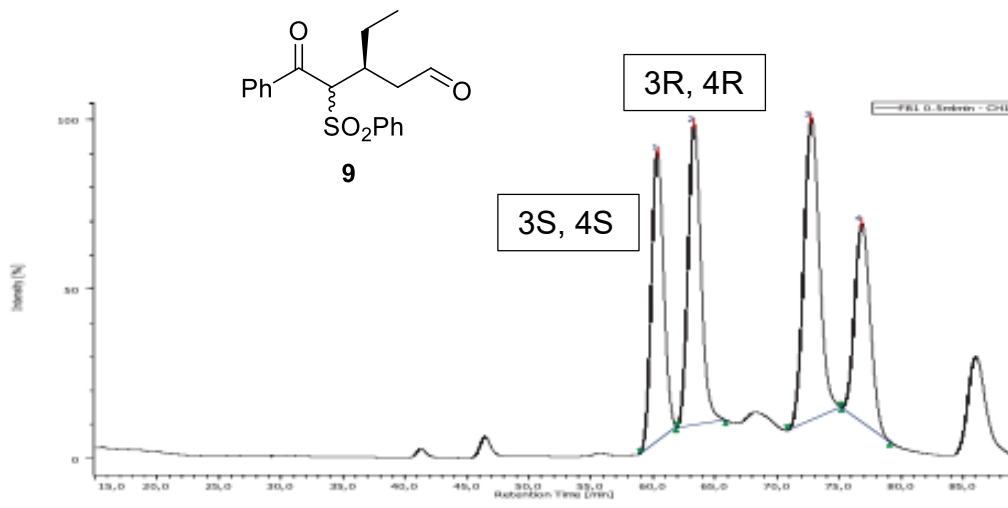

| Peak | tR     | Area     | Height | Area%  | Height% | Symmetry |
|------|--------|----------|--------|--------|---------|----------|
| 1    | 60,300 | 11857175 | 172685 | 23,166 | 26,510  | 1,081    |
| 2    | 63,267 | 13162907 | 180153 | 25,717 | 27,656  | 1,166    |
| 3    | 72,717 | 15761890 | 179770 | 30,795 | 27,598  | 1,102    |
| 4    | 76,783 | 10400826 | 118789 | 20,321 | 18,236  | 1,109    |

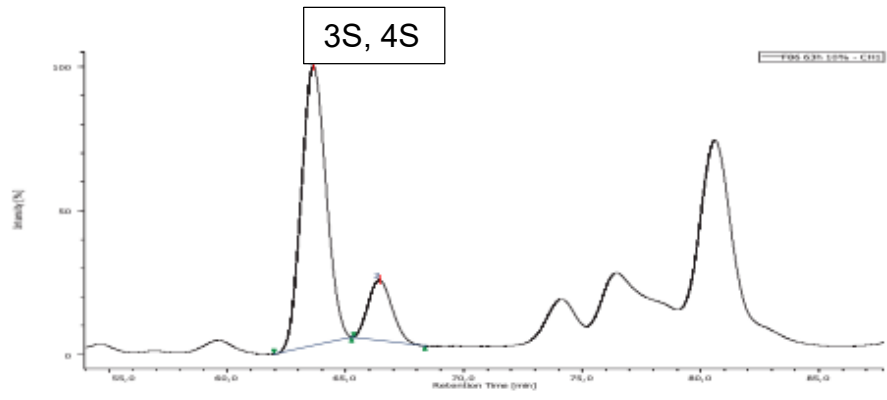

| Peak | tR     | Area    | Height | Area%  | Height% | Symmetry |
|------|--------|---------|--------|--------|---------|----------|
| 1    | 63.625 | 1114737 | 15372  | 82.626 | 82.227  | 1.074    |
| 2    | 66.408 | 234402  | 3323   | 17.374 | 17.773  | 1.150    |

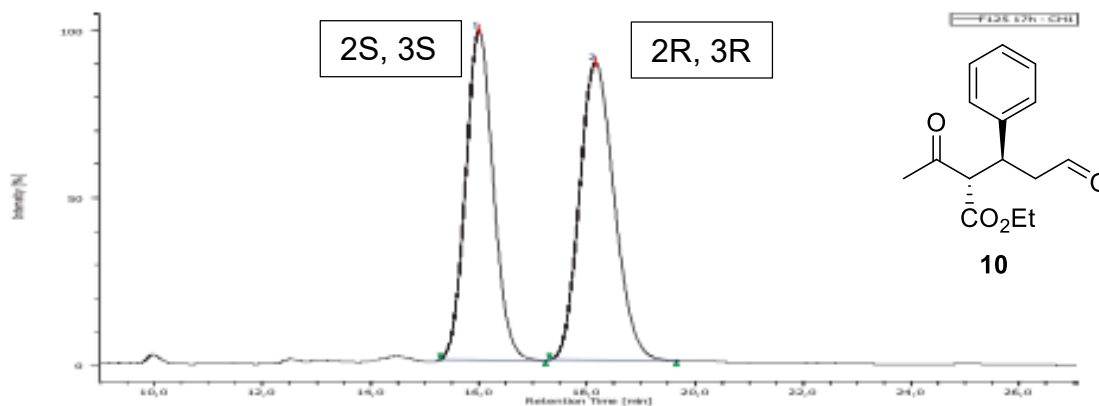

| Peak | tR     | Area    | Height | Area%  | Height% | Symmetry |
|------|--------|---------|--------|--------|---------|----------|
| 1    | 15.992 | 4578360 | 129342 | 46.761 | 52.521  | 1.093    |
| 2    | 18.150 | 5212637 | 116924 | 53.239 | 47.479  | 1.160    |

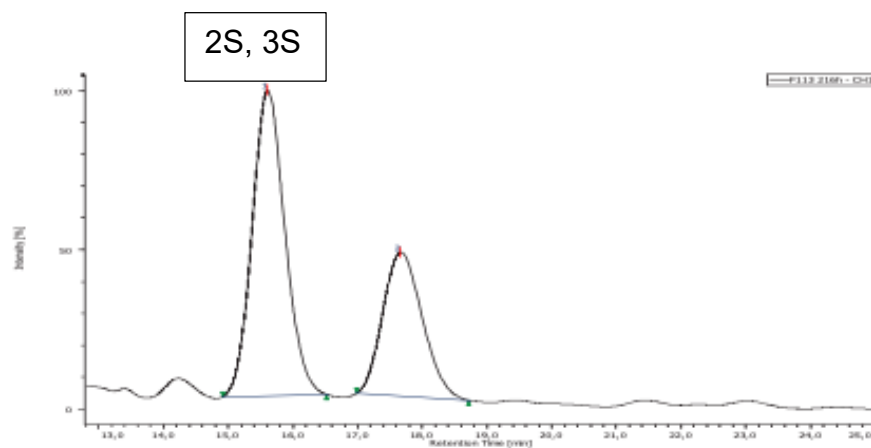

| Peak | tR     | Area   | Height | Area%  | Height% | Symmetry |
|------|--------|--------|--------|--------|---------|----------|
| 1    | 15,608 | 812803 | 23073  | 63,870 | 68,006  | 1,105    |
| 2    | 17,658 | 459789 | 10855  | 36,130 | 31,994  | 1,179    |



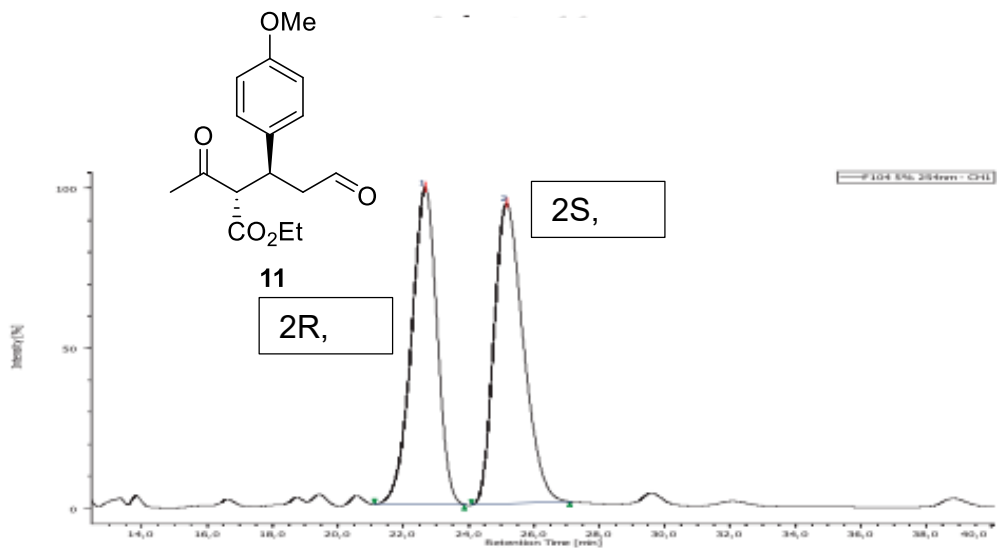

| Peak | tR     | Area     | Height | Area%  | Height% | Symmetry |
|------|--------|----------|--------|--------|---------|----------|
| 1    | 22.658 | 11024311 | 202346 | 48.023 | 51.337  | 0.912    |
| 2    | 25.142 | 11932084 | 191809 | 51.977 | 48.663  | 1.304    |

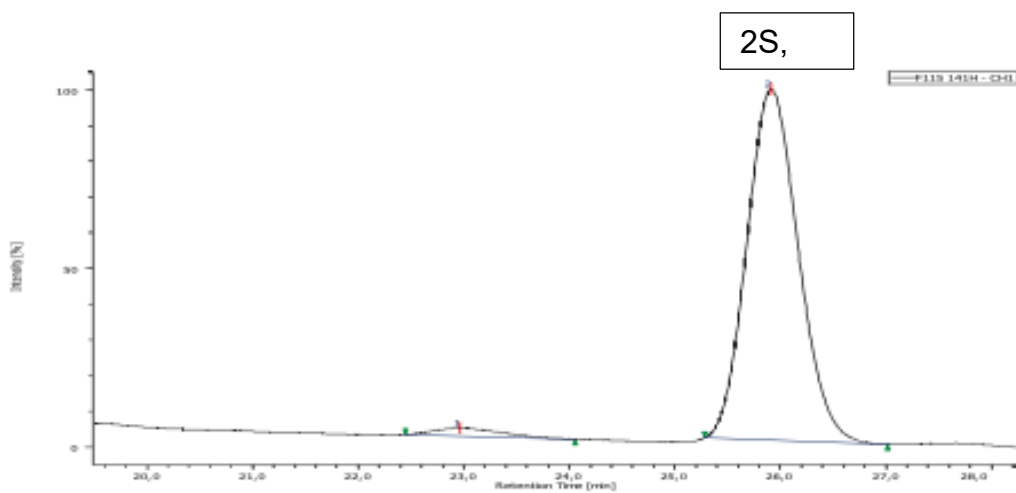

| Peak | tR     | Area   | Height | Area%  | Height% | Symmetry |
|------|--------|--------|--------|--------|---------|----------|
| 1    | 22,967 | 5615   | 125    | 2,971  | 2,262   | 1,367    |
| 2    | 25,908 | 183384 | 5411   | 97,029 | 97,738  | 1,113    |

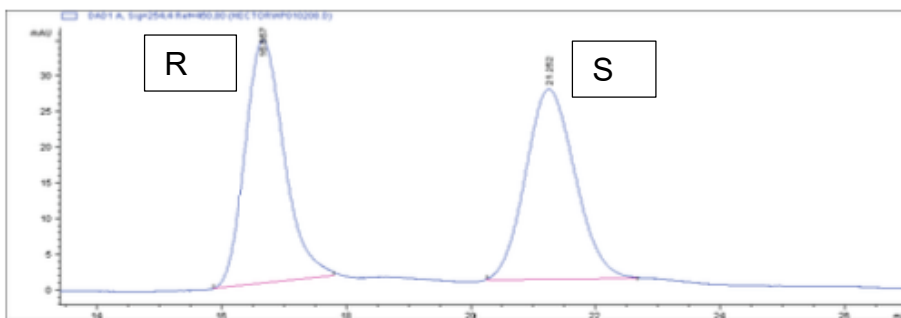

| # | Time   | Area   | Height | Width  | Area%  | Symmetry |
|---|--------|--------|--------|--------|--------|----------|
| 1 | 16.657 | 1485.3 | 34.2   | 0.5547 | 50.227 | 0.835    |
| 2 | 21.252 | 1471.8 | 26.6   | 0.7021 | 49.773 | 0.885    |

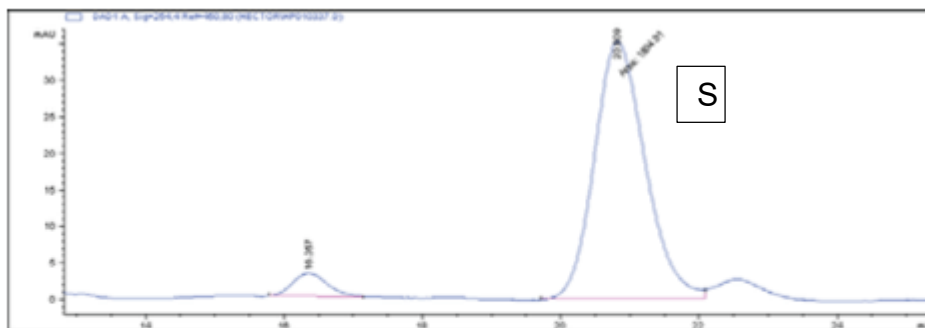

| # | Time   | Area | Height | Width  | Area%  | Symmetry |
|---|--------|------|--------|--------|--------|----------|
| 1 | 16.357 | 109  | 3.1    | 0.4196 | 5.696  | 0.871    |
| 2 | 20.809 | 1804 | 35.3   | 0.8519 | 94.304 | 0.791    |

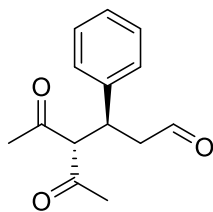

12

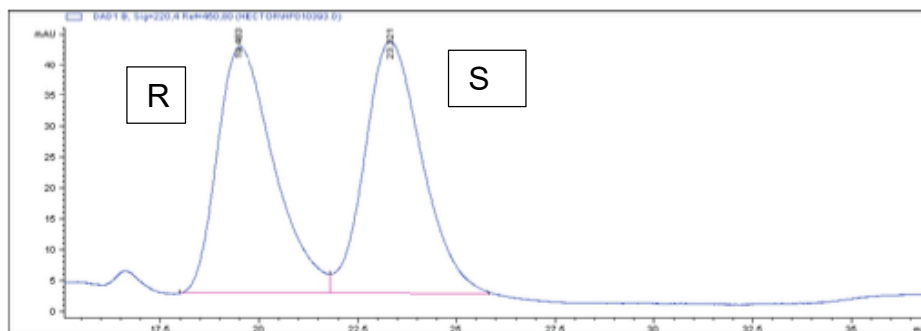

| # | Time   | Area   | Height | Width  | Area%  | Symmetry |
|---|--------|--------|--------|--------|--------|----------|
| 1 | 19.483 | 4004   | 40.1   | 1.1751 | 49.288 | 0.605    |
| 2 | 23.321 | 4119.7 | 41     | 1.1813 | 50.712 | 0.806    |

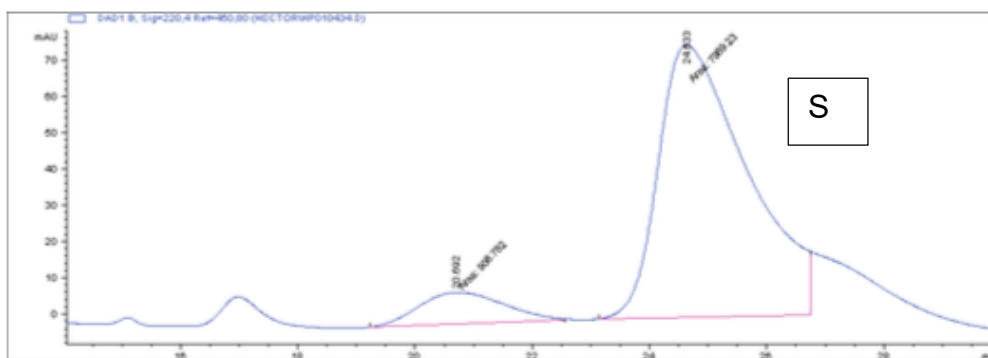

| # | Time   | Area   | Height | Width  | Area%  | Symmetry |
|---|--------|--------|--------|--------|--------|----------|
| 1 | 20.692 | 908.8  | 8.9    | 1.7091 | 10.236 | 0.779    |
| 2 | 24.633 | 7969.2 | 75.1   | 1.7679 | 89.764 | 0.467    |

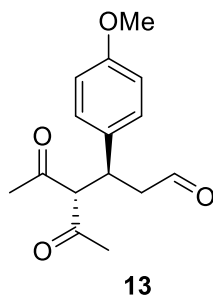

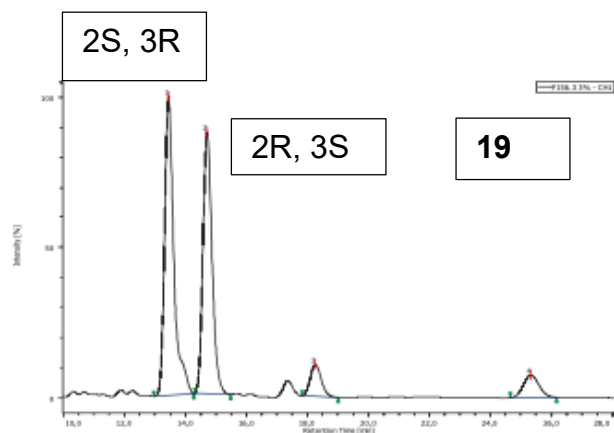

| Peak Name | tR     | Area    | Height | Area%  | Height% | NTP   | Resolution | Symmetry Factor |
|-----------|--------|---------|--------|--------|---------|-------|------------|-----------------|
| anti      | 13,442 | 5231322 | 247772 | 47,231 | 48,576  | 11288 | 2,411      | 1,572           |
| anti      | 14,700 | 4526485 | 217358 | 40,867 | 42,613  | 11839 | 5,910      | 1,219           |
| syn       | 18,250 | 659154  | 26292  | 5,951  | 5,155   | 12077 | 8,835      | 1,158           |
| syn       | 25,308 | 659057  | 18650  | 5,950  | 3,656   | 11654 | N/A        | 1,108           |

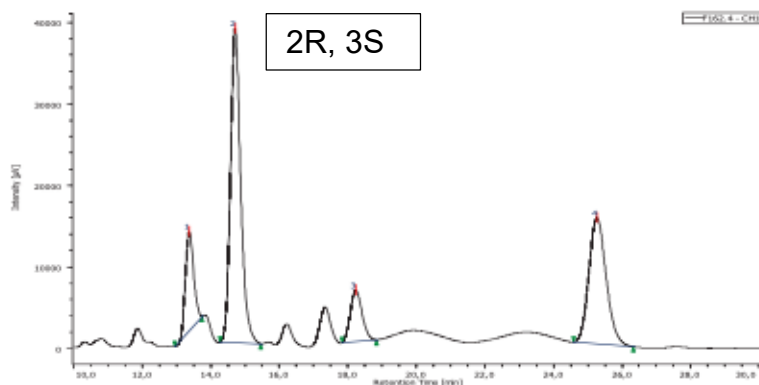

| Peak Name | tR     | Area   | Height | Area%  | Height% | Quantity | NTP   | Resolution |
|-----------|--------|--------|--------|--------|---------|----------|-------|------------|
| anti      | 13,375 | 203245 | 12078  | 11,972 | 16,711  | N/A      | 14038 | 2,719      |
| anti      | 14,708 | 801278 | 38475  | 47,198 | 53,233  | N/A      | 12246 | 6,022      |
| syn       | 18,225 | 149660 | 6253   | 8,816  | 8,651   | N/A      | 13002 | 9,031      |
| syn       | 25,250 | 543496 | 15471  | 32,014 | 21,405  | N/A      | 12039 | N/A        |

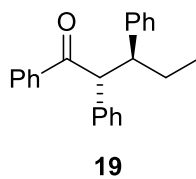

Supplement: Additional file 1 [file 1860-5397-21-34-S1.pdf]
